# Supplementary material
Source: PubMed Central journal article supplement (PMC7030884)
Supplement: NIHMS1550593-supplement-1.pdf [file NIHMS1550593-supplement-1.pdf]

Cell Reports, Volume 30

## Supplemental Information

### Tissue-Resident PDGFR $\alpha$ <sup>+</sup> Progenitor Cells

Contribute to Fibrosis versus Healing in a

Context- and Spatiotemporally Dependent Manner

Maria Paola Santini, Daniela Malide, Gabriel Hoffman, Gaurav Pandey, Valentina D'Escamard, Aya Nomura-Kitabayashi, Ilsa Rovira, Hiroshi Kataoka, Jordi Ochando, Richard P. Harvey, Toren Finkel, and Jason C. Kovacic

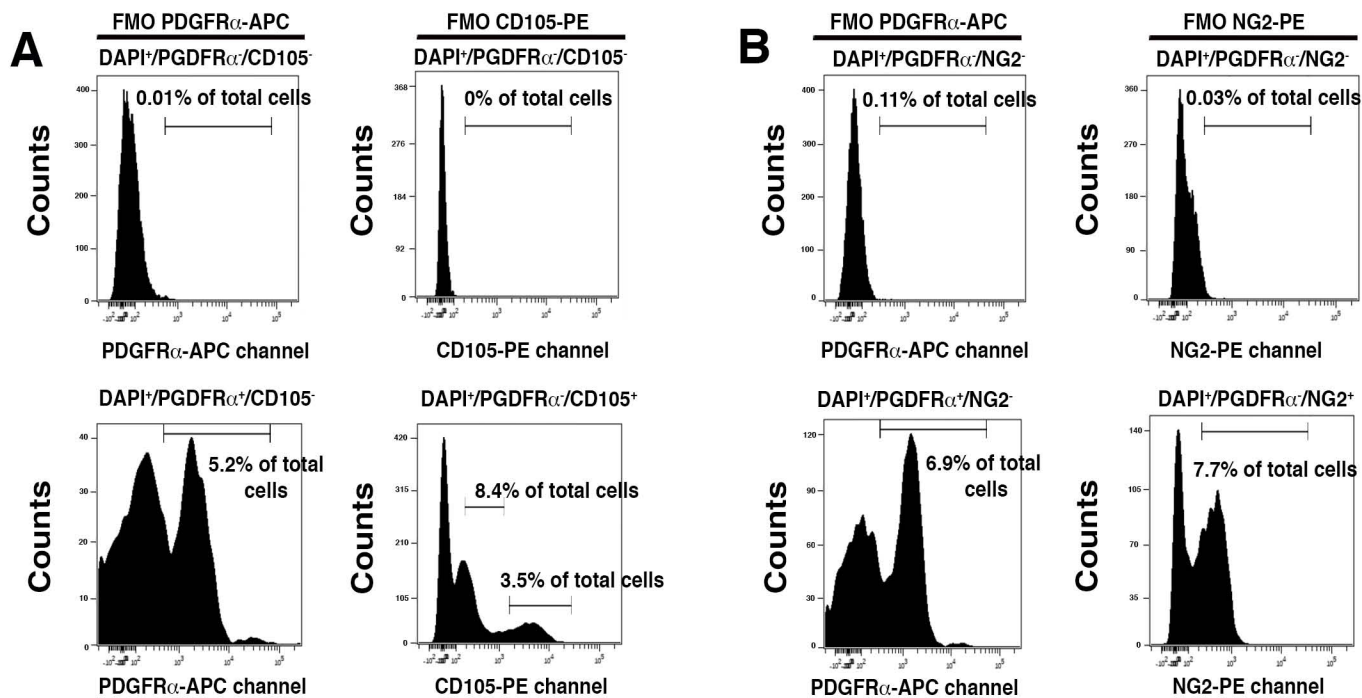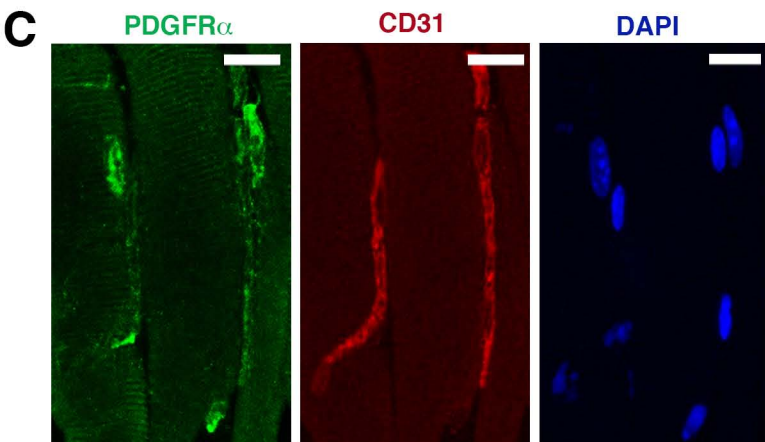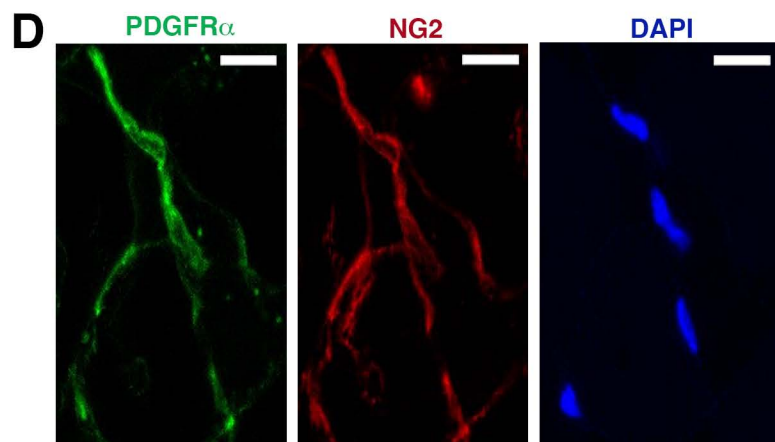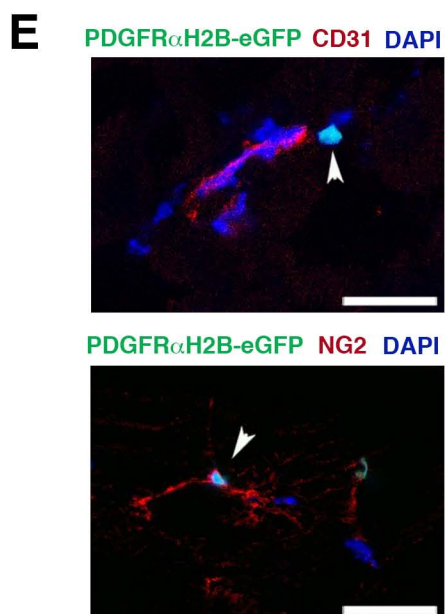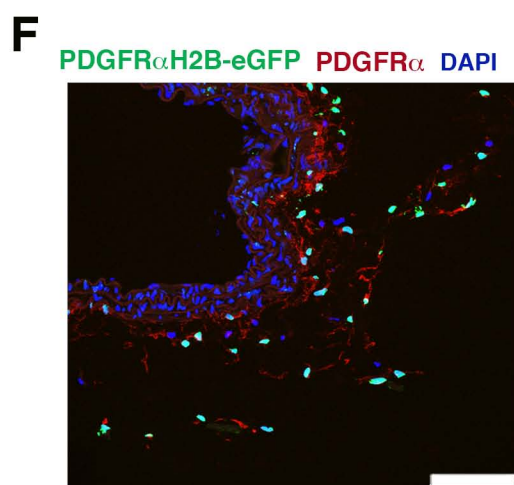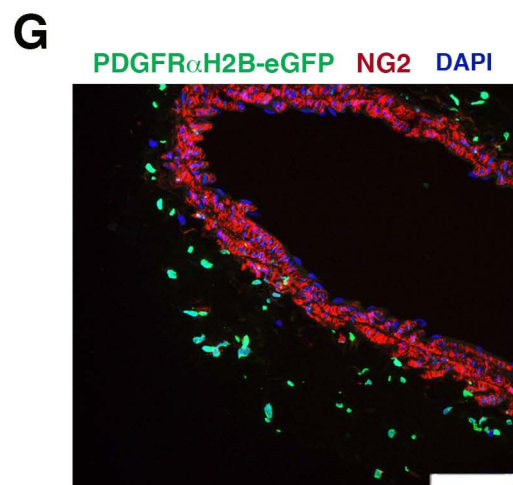

**Figure S1. Flow cytometric and histological assessment of PDGFR $\alpha$ <sup>+</sup> cells. Related to Figure 1.**

**(A-B)** Fluorescence minus one (FMO) controls were used to set the gates of all flow cytometric analyses shown in Figure 1A-B. Representative FMO controls are shown for PDGFR $\alpha$ <sup>+</sup> cells co-positive for CD105 (**S1A**) and NG2 (**S1B**). These were selected because they demonstrate FMO controls for a population with both a high and low co-positive population (S1A; CD105) and single co-positive population (S1B; NG2). All analyses were performed in n=3 independent experiments. **(C-D)** Single color channels of immunofluorescence for PDGFR $\alpha$ <sup>+</sup> cells with CD31 (S1C; corresponds to Figure 1C) or NG2 (S1D; corresponds to Figure 1E) in skeletal muscle of 4 month old healthy uninjured mice, performed as described in Star Methods. Images represent merged z-stacks acquired with a Leica SP5 DM confocal. Scale bars 20 $\mu$ m. **(E)** Immunofluorescence analysis of skeletal muscle from 4 month old *PdgfraH2B-eGfp* mice. White arrowheads show GFP<sup>+</sup>NG2<sup>+</sup> co-positive cells (lower panels) or proximity of GFP<sup>+</sup> cells with CD31<sup>+</sup> cells (upper panel). Staining was performed with rat monoclonal CD31 and mouse monoclonal NG2 antibody. Images represent merged z-stacks acquired with a Leica SP5 DM confocal. Scale bars 25 $\mu$ m. **(F-G)** Thoracic aortas from 4 month old *PdgfraH2B-eGfp* mice were isolated and analyzed for expression of PDGFR $\alpha$  (**F**) and NG2 (**G**). Fresh frozen 10 $\mu$ m sections were stained with anti-GFP 1:500 Abcam, ab13970; PDGFR $\alpha$ , 1:50, Cell signaling, 3174P and NG2, 1:50 Abcam, ab83178. Images represent z-stacks acquired with a Leica SP5 DM confocal. Scale bars 75 $\mu$ m.

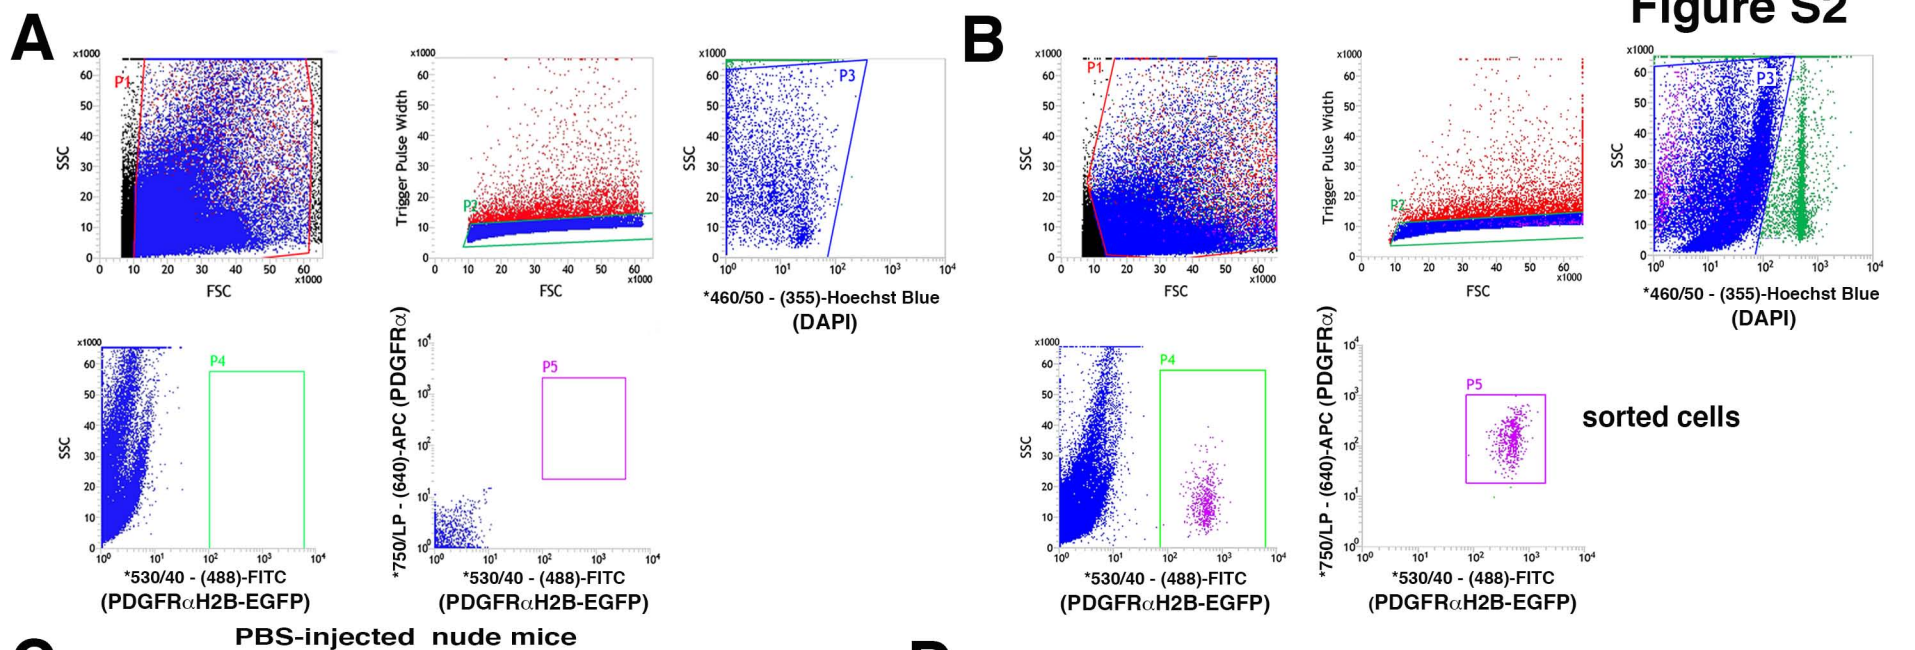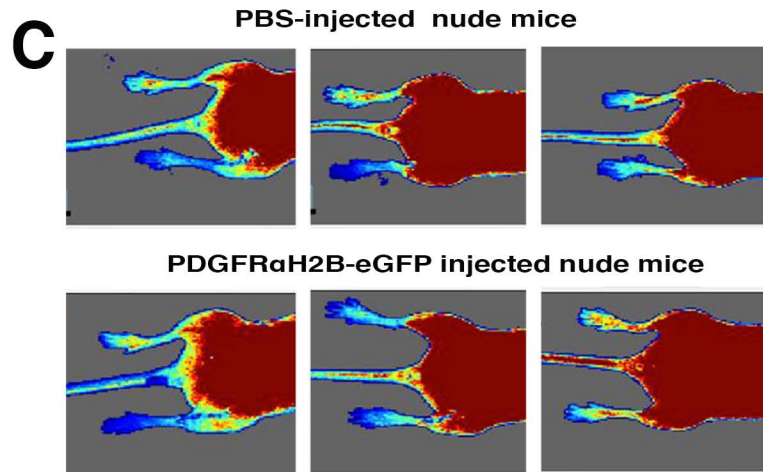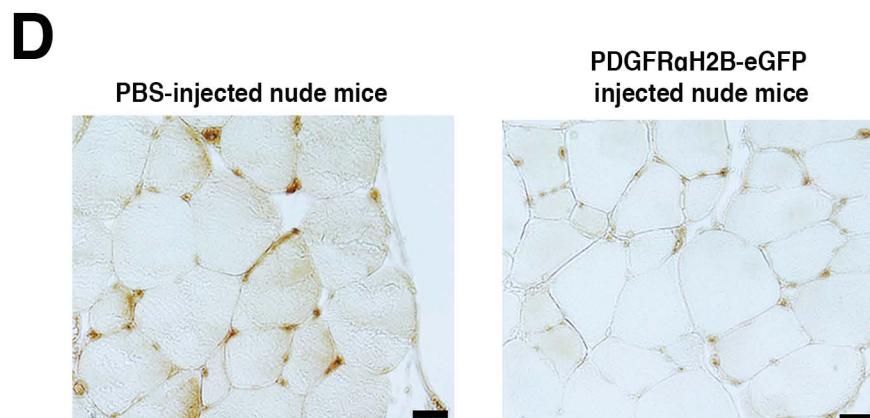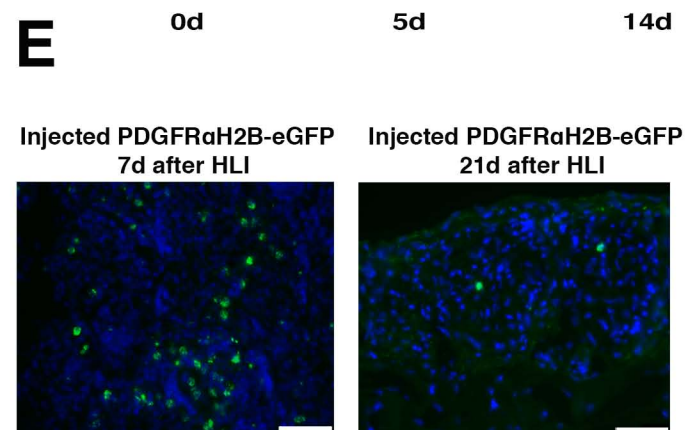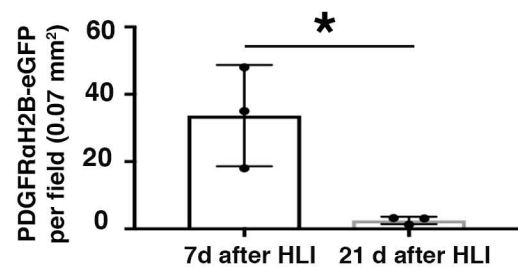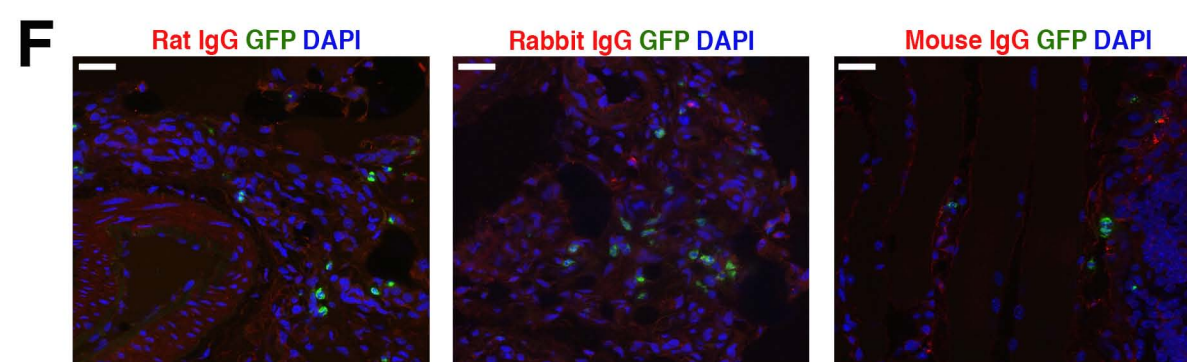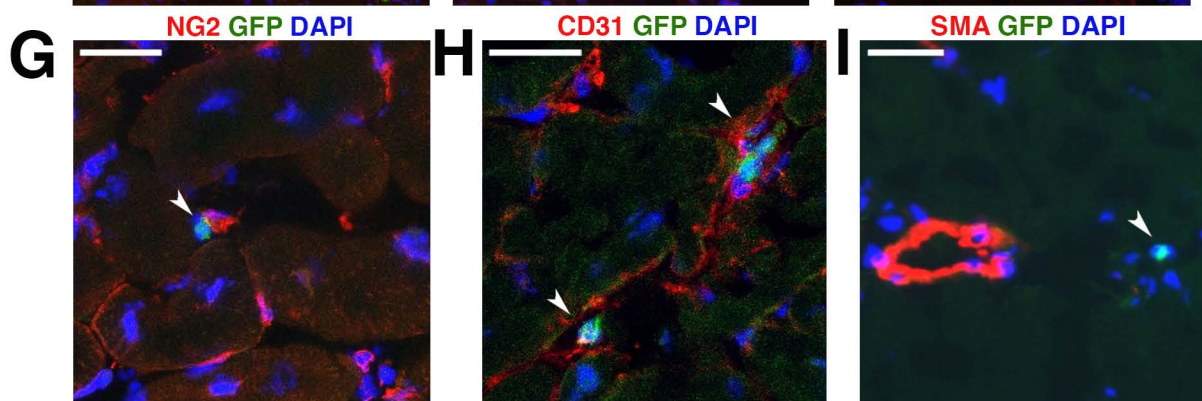

**Figure S2. PDGFR $\alpha$ <sup>+</sup> cell function in tissue revascularization after hindlimb ischemia. Related to Figures 2 and 3.**

Undifferentiated GFP<sup>+</sup>PDGFR $\alpha$ <sup>+</sup> co-positive cells from 3 month old *PdgfraH2B-eGfp* male mice were injected into the adductor muscle of 7 month old nude female mice 24 hours after HLI. **(A-B)** Adductor skeletal muscles were isolated from 3 month old male WT control mice and left un-labeled (also without DAPI) to set FACS gates for sorting **(A)**, or labeled with anti-PDGFR $\alpha$  APC-conjugated antibody and DAPI to sort for GFP<sup>+</sup>PDGFR $\alpha$ <sup>+</sup> co-positive cells from *PdgfraH2B-eGfp* mice **(B)**. The Hoechst Blue channel distinguishes DAPI<sup>-</sup> live cells (gate P3) from dead (DAPI<sup>+</sup>) cells. Taking the live DAPI<sup>-</sup> population, FITC was used to specify for *PdgfraH2B-eGfp*<sup>+</sup> cells (gate P4). In the final panel, the FITC (x axis) and APC (y axis) specifies for cells double positive for GFP and APC (after labeling with anti-PDGFR $\alpha$  APC-conjugated antibody) (gate P5). Sorted live GFP<sup>+</sup>PDGFR $\alpha$ <sup>+</sup> co-positive cells were processed for further analyses (RNAseq and adoptive transfer experiments). **(C)** Representative images of blood flow acquired with a MoorFLPI Full Field Laser Perfusion Imager Review V4.0 (Moor Instruments Ltd) after HLI. **(D)** Representative capillary images 21 days after HLI induction using isolectin B4 staining on 8 $\mu$ m paraffin sections. Sections were stained with biotinylated isolectin B4 (Sigma Aldrich, Inc) overnight at 4°C. Capillaries were counted from 4 separate sections for each mouse (n=3 per group) in an area of 0.1mm<sup>2</sup>. Scale bar 20 $\mu$ m. **(E)** Approximately 7x10<sup>5</sup> GFP<sup>+</sup>PDGFR $\alpha$ <sup>+</sup> co-positive cells were injected in the adductor muscle after HLI and these tissue samples were analyzed at 7 and 21 days for their GFP<sup>+</sup> cell content. Scale bars 50 $\mu$ m. Images were acquired with a Leica DMI8, Application Suite X, DCF365FX camera. Pictures are representative of n=3 mice. Quantification was performed using Image J. GFP<sup>+</sup>PDGFR $\alpha$ <sup>+</sup> co-positive cells were counted in each field where the presence of the cells was maximal as described in Star Methods. Data represent mean  $\pm$  SD. \*P<0.05. **(F)** Control staining corresponding to Figure 3. Seven days after HLI induction and adoptive transfer of undifferentiated GFP<sup>+</sup>PDGFR $\alpha$ <sup>+</sup> co-positive cells, injected cells were tracked by nuclear GFP expression and co-staining with rat (control IgG for CD31), mouse (control IgG for  $\alpha$ SMA) and rabbit IgG (control IgG for NG2) as described in Star Methods to analyze antibody specificity. Scale bar 25 $\mu$ m. Z-stacks images were acquired with a Leica SP5 DM confocal microscope. **(G-I)** Three weeks after HLI induction and adoptive transfer of undifferentiated GFP<sup>+</sup>PDGFR $\alpha$ <sup>+</sup> cells, injected cells were tracked by nuclear GFP expression (white arrowheads) and co-staining with rabbit anti-mouse NG2 **(G)**, rat anti-mouse CD31 antibody to detect capillaries **(H)** and Cy3-conjugated anti- $\alpha$ SMA antibody to detect large vessels **(I)**. Scale bars 20 $\mu$ m. Images are representative of n=3 independent experiments. Z-stack images in (G-H) were obtained with a Leica SP5 DM confocal microscope. Image in (I) was obtained with a Leica CTR 5500 microscope and DFC340FX camera.

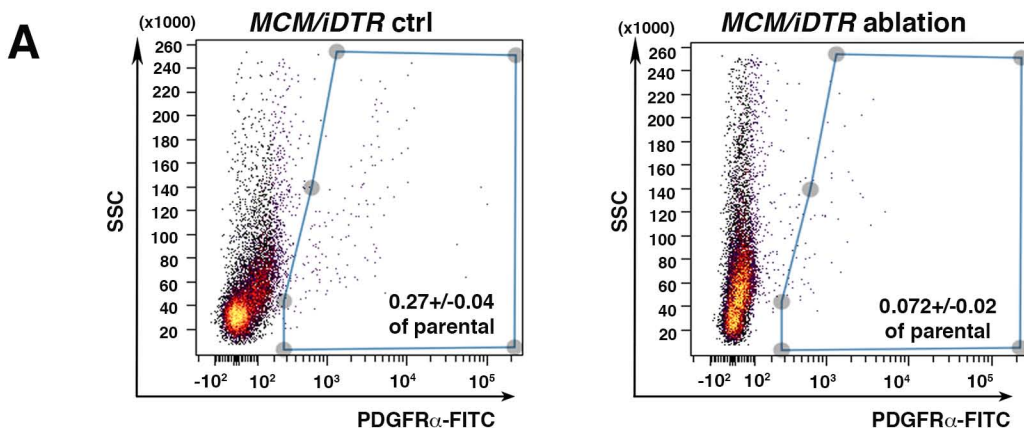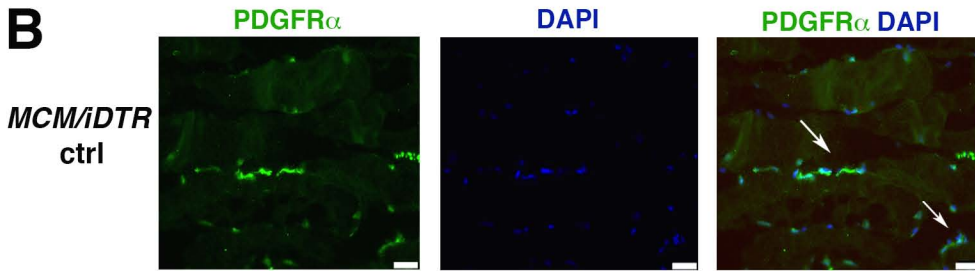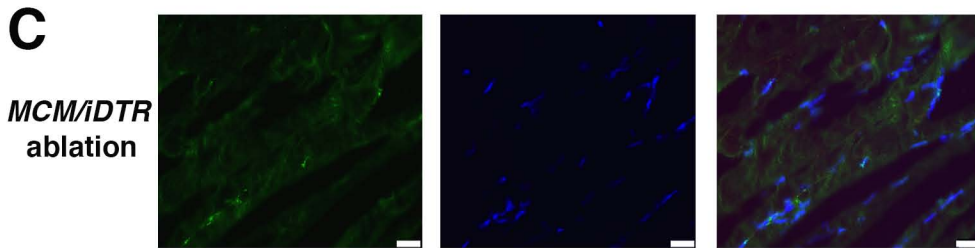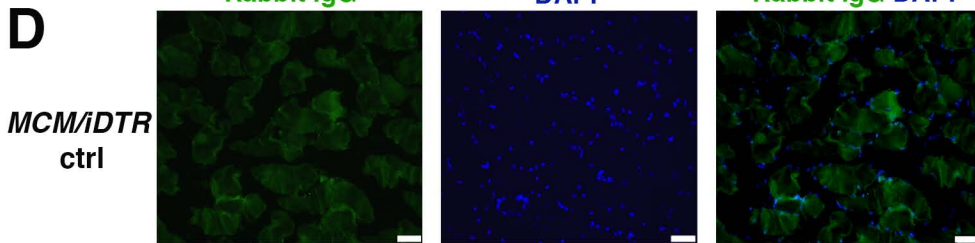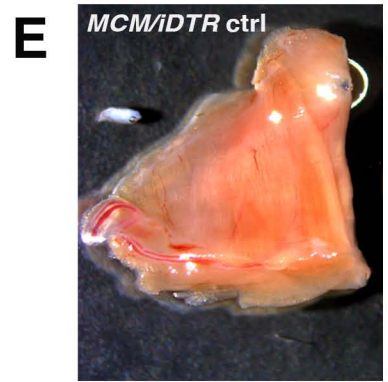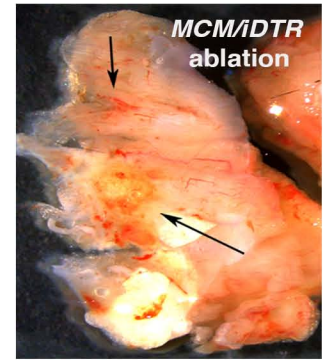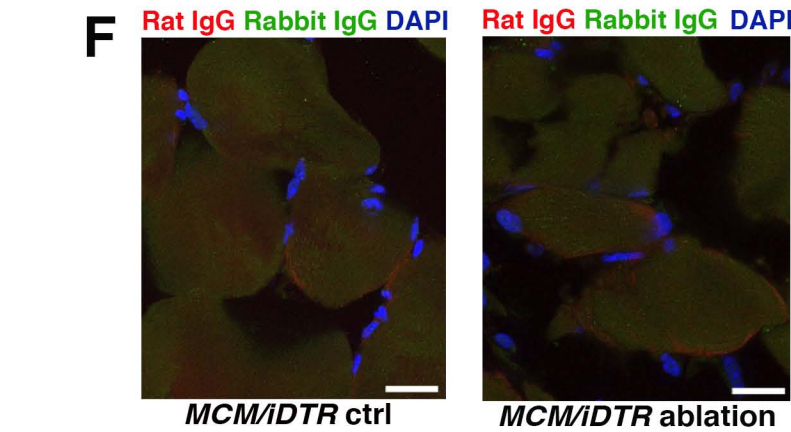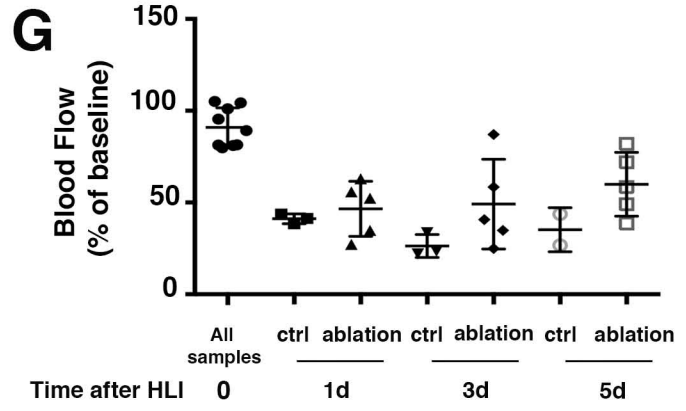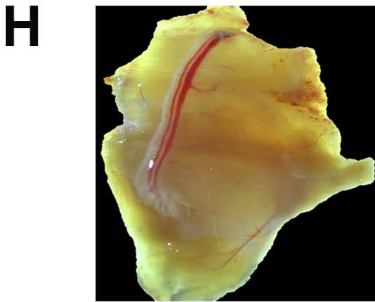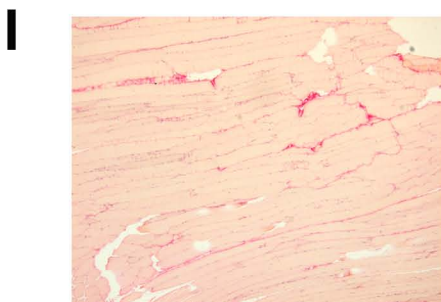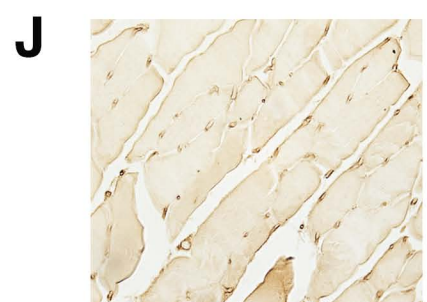

**Figure S3. Modulation of tissue revascularization after PDGFR $\alpha$ <sup>+</sup> cell ablation. Related to Figure 4.**

**(A)** Flow cytometric analysis of hindlimbs from *MCM<sup>+</sup>/iDTR<sup>+/-</sup>* mice treated with tamoxifen and DTX (*MCM/iDTR* ablation) versus peanut oil and DTX (*MCM/iDTR* control, ctrl) 5 days after HLI induction. PDGFR $\alpha$ <sup>+</sup> cells were labeled with FITC-conjugated anti-PDGFR $\alpha$  antibody (1  $\mu$ g per million cells) (eBioscience). Data were analyzed using the Cytobank web application. Each *MCM/iDTR* ablation mouse was validated with flow cytometric analysis and only those showing successful ablation of PDGFR $\alpha$ <sup>+</sup> cells were used for further experiments. Ablation was successful in 4 out of 5 treated animals, and the panels here represent the flow cytometric data in n=4 animals for *MCM/iDTR* ablation and n=4 for *MCM/iDTR* controls in a fraction of the skeletal muscles. **(B-D)** Cell ablation was also verified by immunofluorescence staining with anti-PDGFR $\alpha$  antibody on 8  $\mu$ m frozen sections of a small hindlimb tissue fragment from *MCM/iDTR* controls (n=3) and *MCM/iDTR* ablated mice (n=3) after HLI. Arrows in (B) show interstitial PDGFR $\alpha$ <sup>+</sup> cells in control mice, while in (C) no PDGFR $\alpha$ <sup>+</sup> cells are seen in *MCM/iDTR* mice after cell ablation. Control rabbit IgG antibody (D) was used on *MCM/iDTR* control mice. Areas shown are adjacent those with ischemic injury. Scale bars 25  $\mu$ m. Images in B-D were acquired with a Leica DMI8, Application Suite X, and a DFC365FX camera. **(E)** Adductor muscles from *MCM/iDTR* ctrl and ablated mice were harvested 5 days after HLI induction and images were obtained under a dissection microscope. Arrows show macroscopically visible hemorrhage. **(F)** Immunofluorescence analysis of *MCM/iDTR* ablated and ctrl adductor muscles with rat IgG (red) and rabbit IgG (green) that correspond to Figures 4D-E. Scale bars 20  $\mu$ m. Images are representative of n=3 independent experiments. Images were obtained with a confocal Leica SP5 DM as z-stacks. **(G)** Blood flow was assessed as indicated in Star Methods. Eight mice were analyzed at time 0 and after HLI were divided randomly as control (peanut oil and DTX treated mice *MCM/iDTR*, n=3) or ablation (tamoxifen and DTX treated mice *MCM/iDTR* ablated, n=5) mice. Data represent mean  $\pm$  SD and are analyzed by one-way ANOVA followed by Tukey's multiple comparison test. There were no differences between the control and ablated groups at any time point. **(H-J)** Representative panels showing **(H)** whole muscles, **(I)** Picosirius Red (scale bar 200  $\mu$ m) and **(J)** isolectin B4 staining (scale bar 25  $\mu$ m) of *MCM/iDTR* ablated adductor muscles in sham-operated (no HLI) mice. Image in (H) was obtained under a dissection microscope. Images in (I and J) were obtained with a Leica DMI8, Application Suite X, and a DCM2900 camera.

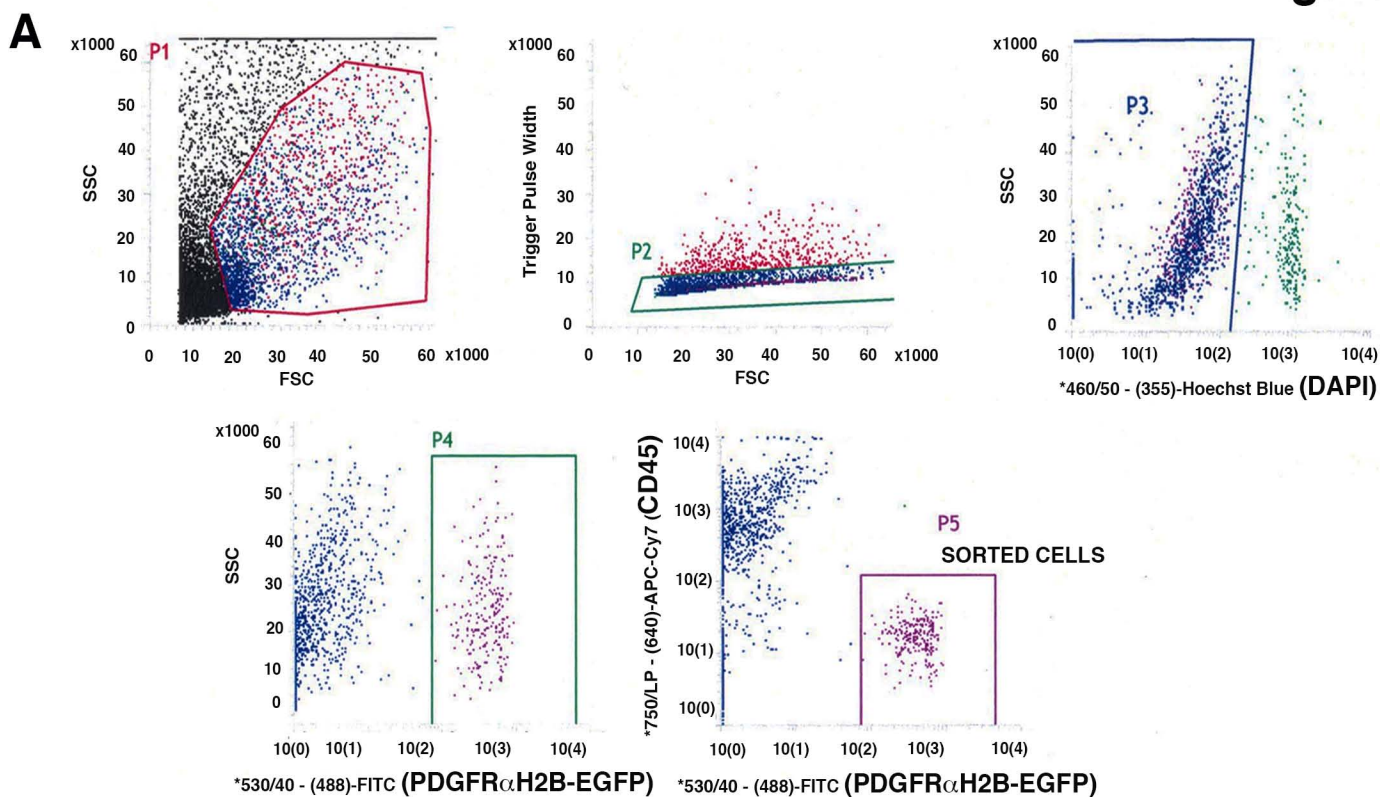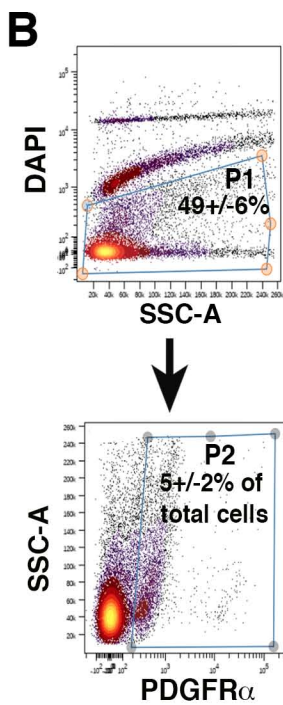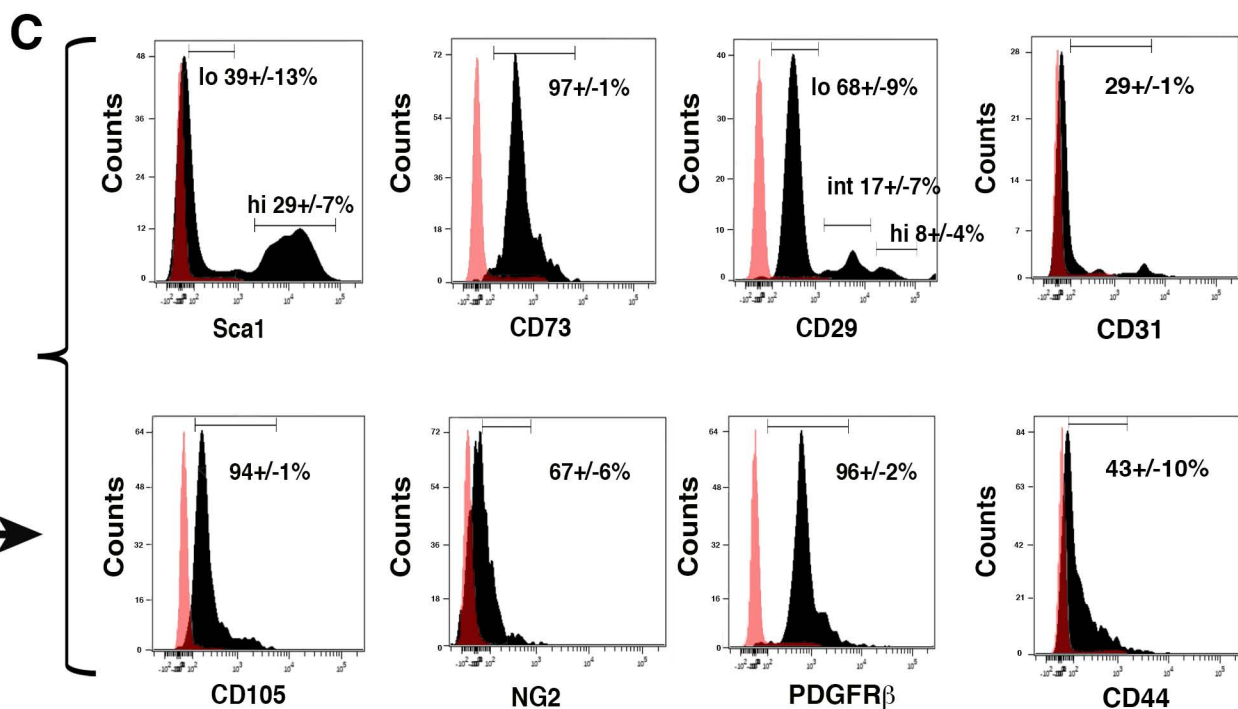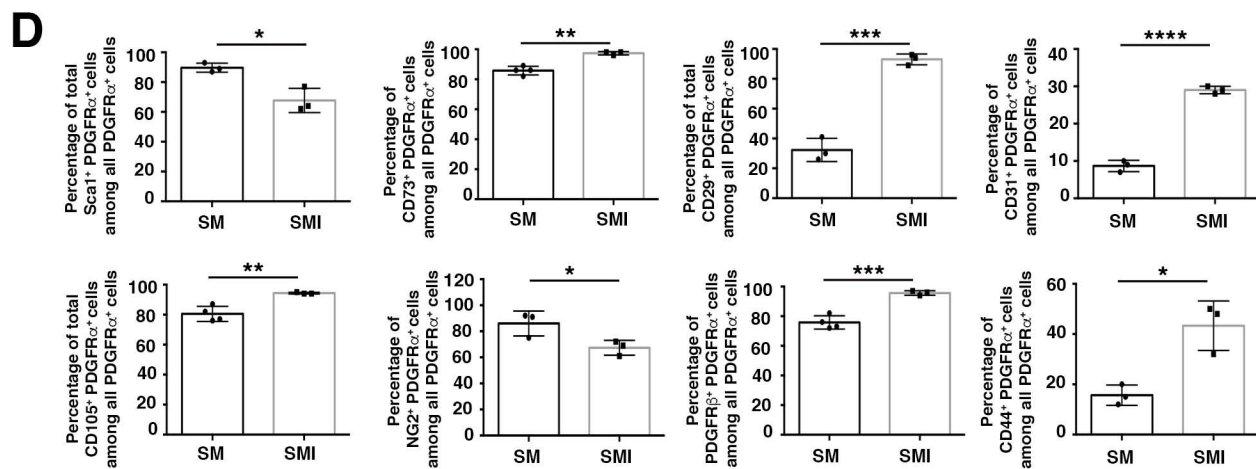



**Figure S4. Characterization of PDGFR $\alpha$ <sup>+</sup> cells at early time points after hindlimb ischemia. Related to Figure 5.**

(A) FACS was performed on digested skeletal muscle from *Pdgfra*<sup>H2B-eGfp</sup> mice 7 days after HLI induction. Cells were labeled with 1  $\mu$ g/ml of DAPI to distinguish live (DAPI<sup>-</sup>) from dead (DAPI<sup>+</sup>) cells (gate P3, upper right panel) and with anti-CD45-APC-Cy7 (1  $\mu$ g/million cells). From the live GFP<sup>+</sup> cell population (P4, lower left panel) we identified GFP<sup>+</sup>PDGFR $\alpha$ <sup>+</sup> cells (P5, lower right panel), which were almost entirely CD45<sup>-</sup> (P5) (only rare, isolated CD45<sup>+</sup>GFP<sup>+</sup>PDGFR $\alpha$ <sup>+</sup> cells were detected – too few to permit reliable quantitation). GFP<sup>+</sup>PDGFR $\alpha$ <sup>+</sup> cells were sorted and underwent RNAseq. FACS plots are representative of 4 independent experiments. (B and C) As separate experiments to (A) and using WT mice at 10-12 weeks of age, flow cytometric analysis of skeletal muscle PDGFR $\alpha$ <sup>+</sup> cells was performed using Cytobank software for phenotypic characterization. Cells were extracted 7 days after HLI from skeletal muscle with Liberase DL (Roche) and labeled for 30 minutes at room temperature with anti-PDGFR $\alpha$ -APC antibody and (C) PE-conjugated antibodies for endothelial (CD31), mesenchymal (Sca1, CD73, CD105, CD29, CD44) and pericyte markers (NG2 and PDGFR $\beta$ ). Cells were gated as a live DAPI<sup>-</sup> population (B, gate P1) and further as PDGFR $\alpha$ -APC<sup>+</sup> (B, gate P2). In C, the panels represent the co-expression expression of PDGFR $\alpha$ <sup>+</sup> cells for these markers. Flow cytometric plots are representative of n=3 independent experiments for all markers. As controls, cells extracted from skeletal muscle were labeled with APC- and PE-conjugated IgG isotype antibodies for the indicated markers and as described in Star Methods. Cells were gated first as a live DAPI<sup>-</sup> population and representative histograms are overlaid (pink peaks) with the indicated mesenchymal, endothelial and pericyte markers. FMO controls were also performed for this experiment and are shown in Figures S5A-B. (D) Quantification by flow cytometry of PDGFR $\alpha$ <sup>+</sup> cells co-positive for endothelial (CD31), mesenchymal (Sca1, CD73, CD105, CD29, CD44) and perivascular markers (NG2 and PDGFR $\beta$ ) in physiologic conditions (uninjured; SM) vs 7 days after HLI (SMI). Percentage of total population for Sca1<sup>+</sup>PDGFR $\alpha$ <sup>+</sup> and CD105<sup>+</sup>PDGFR $\alpha$ <sup>+</sup> co-positive cells includes the low and high populations, whereas for CD29<sup>+</sup>PDGFR $\alpha$ <sup>+</sup> includes the low, high and intermediate populations. Data represent mean  $\pm$  SD. Asterisks indicate \*P<0.05, \*\*P<0.01, \*\*\*P<0.001 and \*\*\*\*P<0.0001. For Sca1, NG2, CD44 and CD31 SM is n=3, whereas for CD105, CD29, CD73 and PDGFR $\beta$  SM is n=4. SMI samples are n=3.

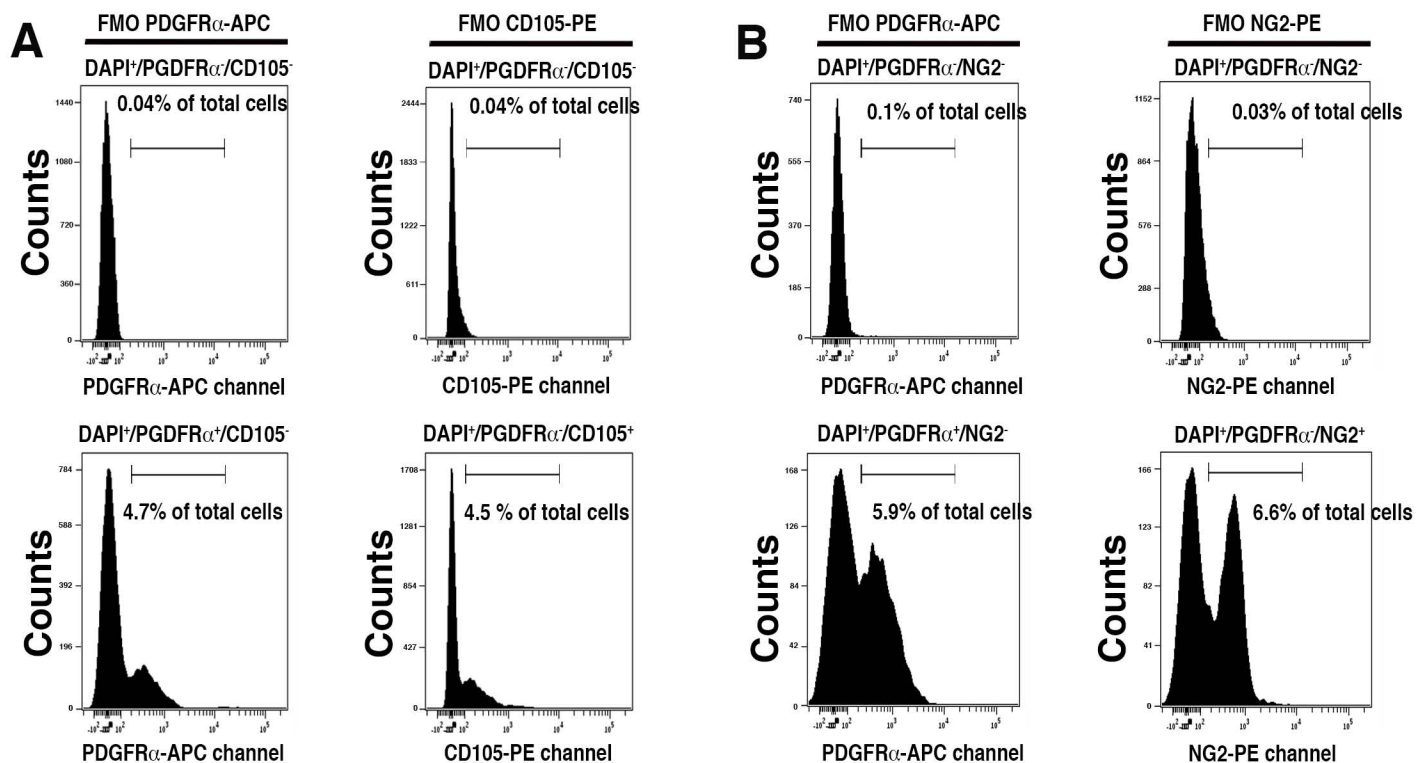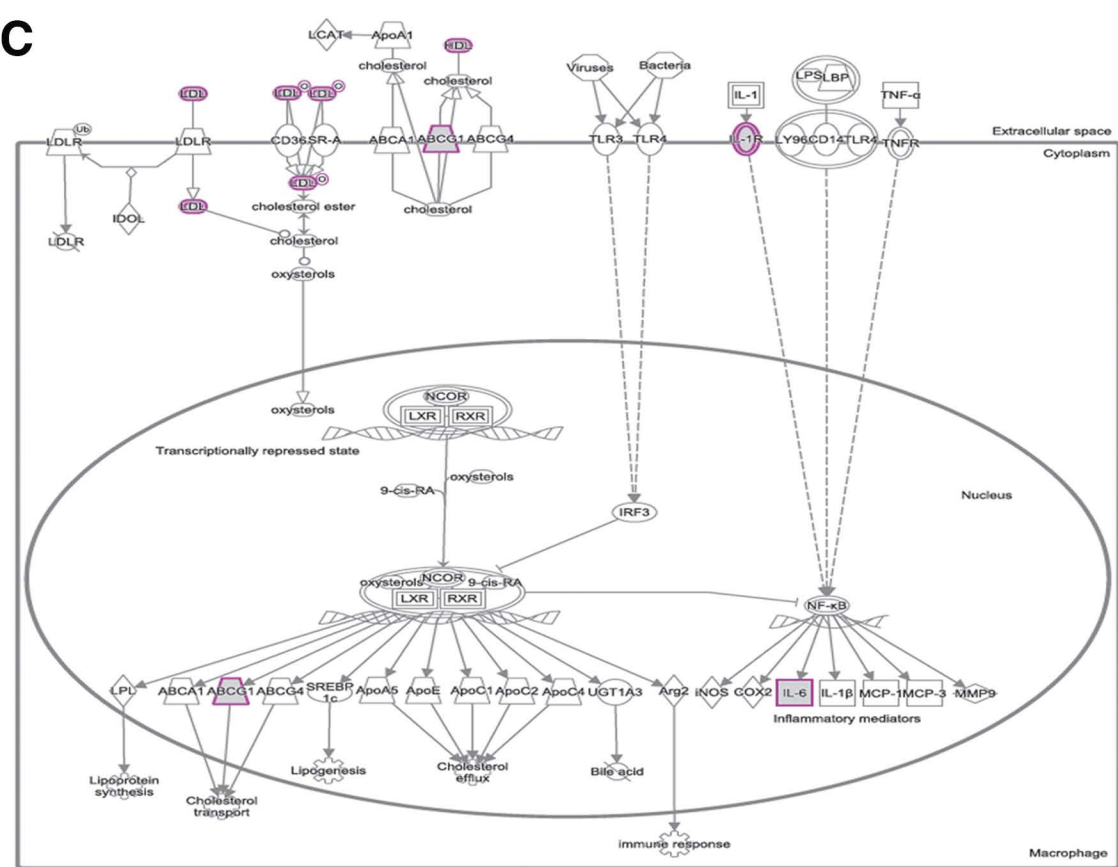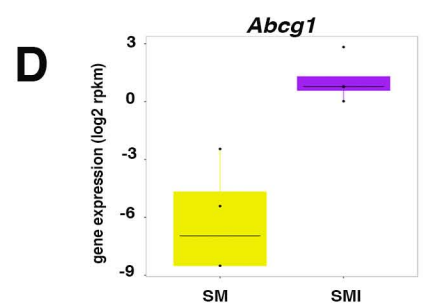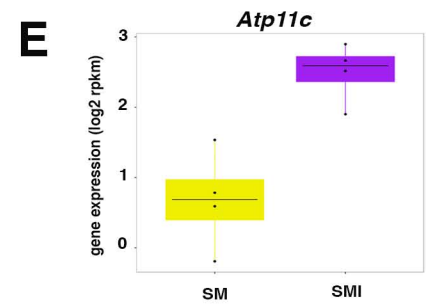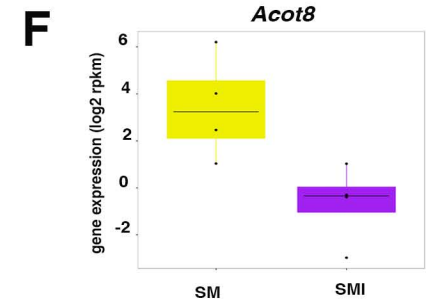

**Figure S5. Characterization of PDGFR $\alpha$ <sup>+</sup> cells at early time points after hindlimb ischemia. Related to Figure 4.**

**(A-B)** Fluorescence minus one (FMO) controls were used to set the gates of the analyses shown in Figures S4B-C. Representative FMO controls are shown for PDGFR $\alpha$ <sup>+</sup> cells co-positive for CD105 **(A)** and NG2 **(B)**. As per Figure S1 these were again selected because they demonstrate FMO controls for a population with both a high and low co-positive population (S5A; CD105) and single co-positive population (S5B; NG2). All the analyses were performed in n=3 independent experiments. **(C)** IPA networks based on differential gene expression of GFP<sup>+</sup>PDGFR $\alpha$ <sup>+</sup> cells 7 days after HLI, as compared to these cells from uninjured *PdgfraH2B-eGfp* mice, show modulation of LXR/RXR signaling (which is implicated in lipid transport). Genes/proteins are illustrated as nodes and molecular relationships as connecting lines between two nodes (direct relationships as normal lines; indirect relationships as dashed lines). Molecular relationships are supported by at least one literature reference, or by canonical information stored in the Ingenuity Pathway Knowledge Base. Purple nodes represent genes of interest (differentially expressed in GFP<sup>+</sup>PDGFR $\alpha$ <sup>+</sup> cells from SM versus SMI hindlimbs), while white nodes represent hubs that were added by the IPA algorithm to connect a set of genes of interest. **(D-F)** RNAseq data showing gene expression differences in GFP<sup>+</sup>PDGFR $\alpha$ <sup>+</sup> cells of transcripts related to lipid transport in SM versus SMI samples, including upregulation of *Abcg1* and *Atp11c* (cholesterol transporter) and downregulation of *Acot8* (hydrolysis of AcylCoA).

**Figure S6**

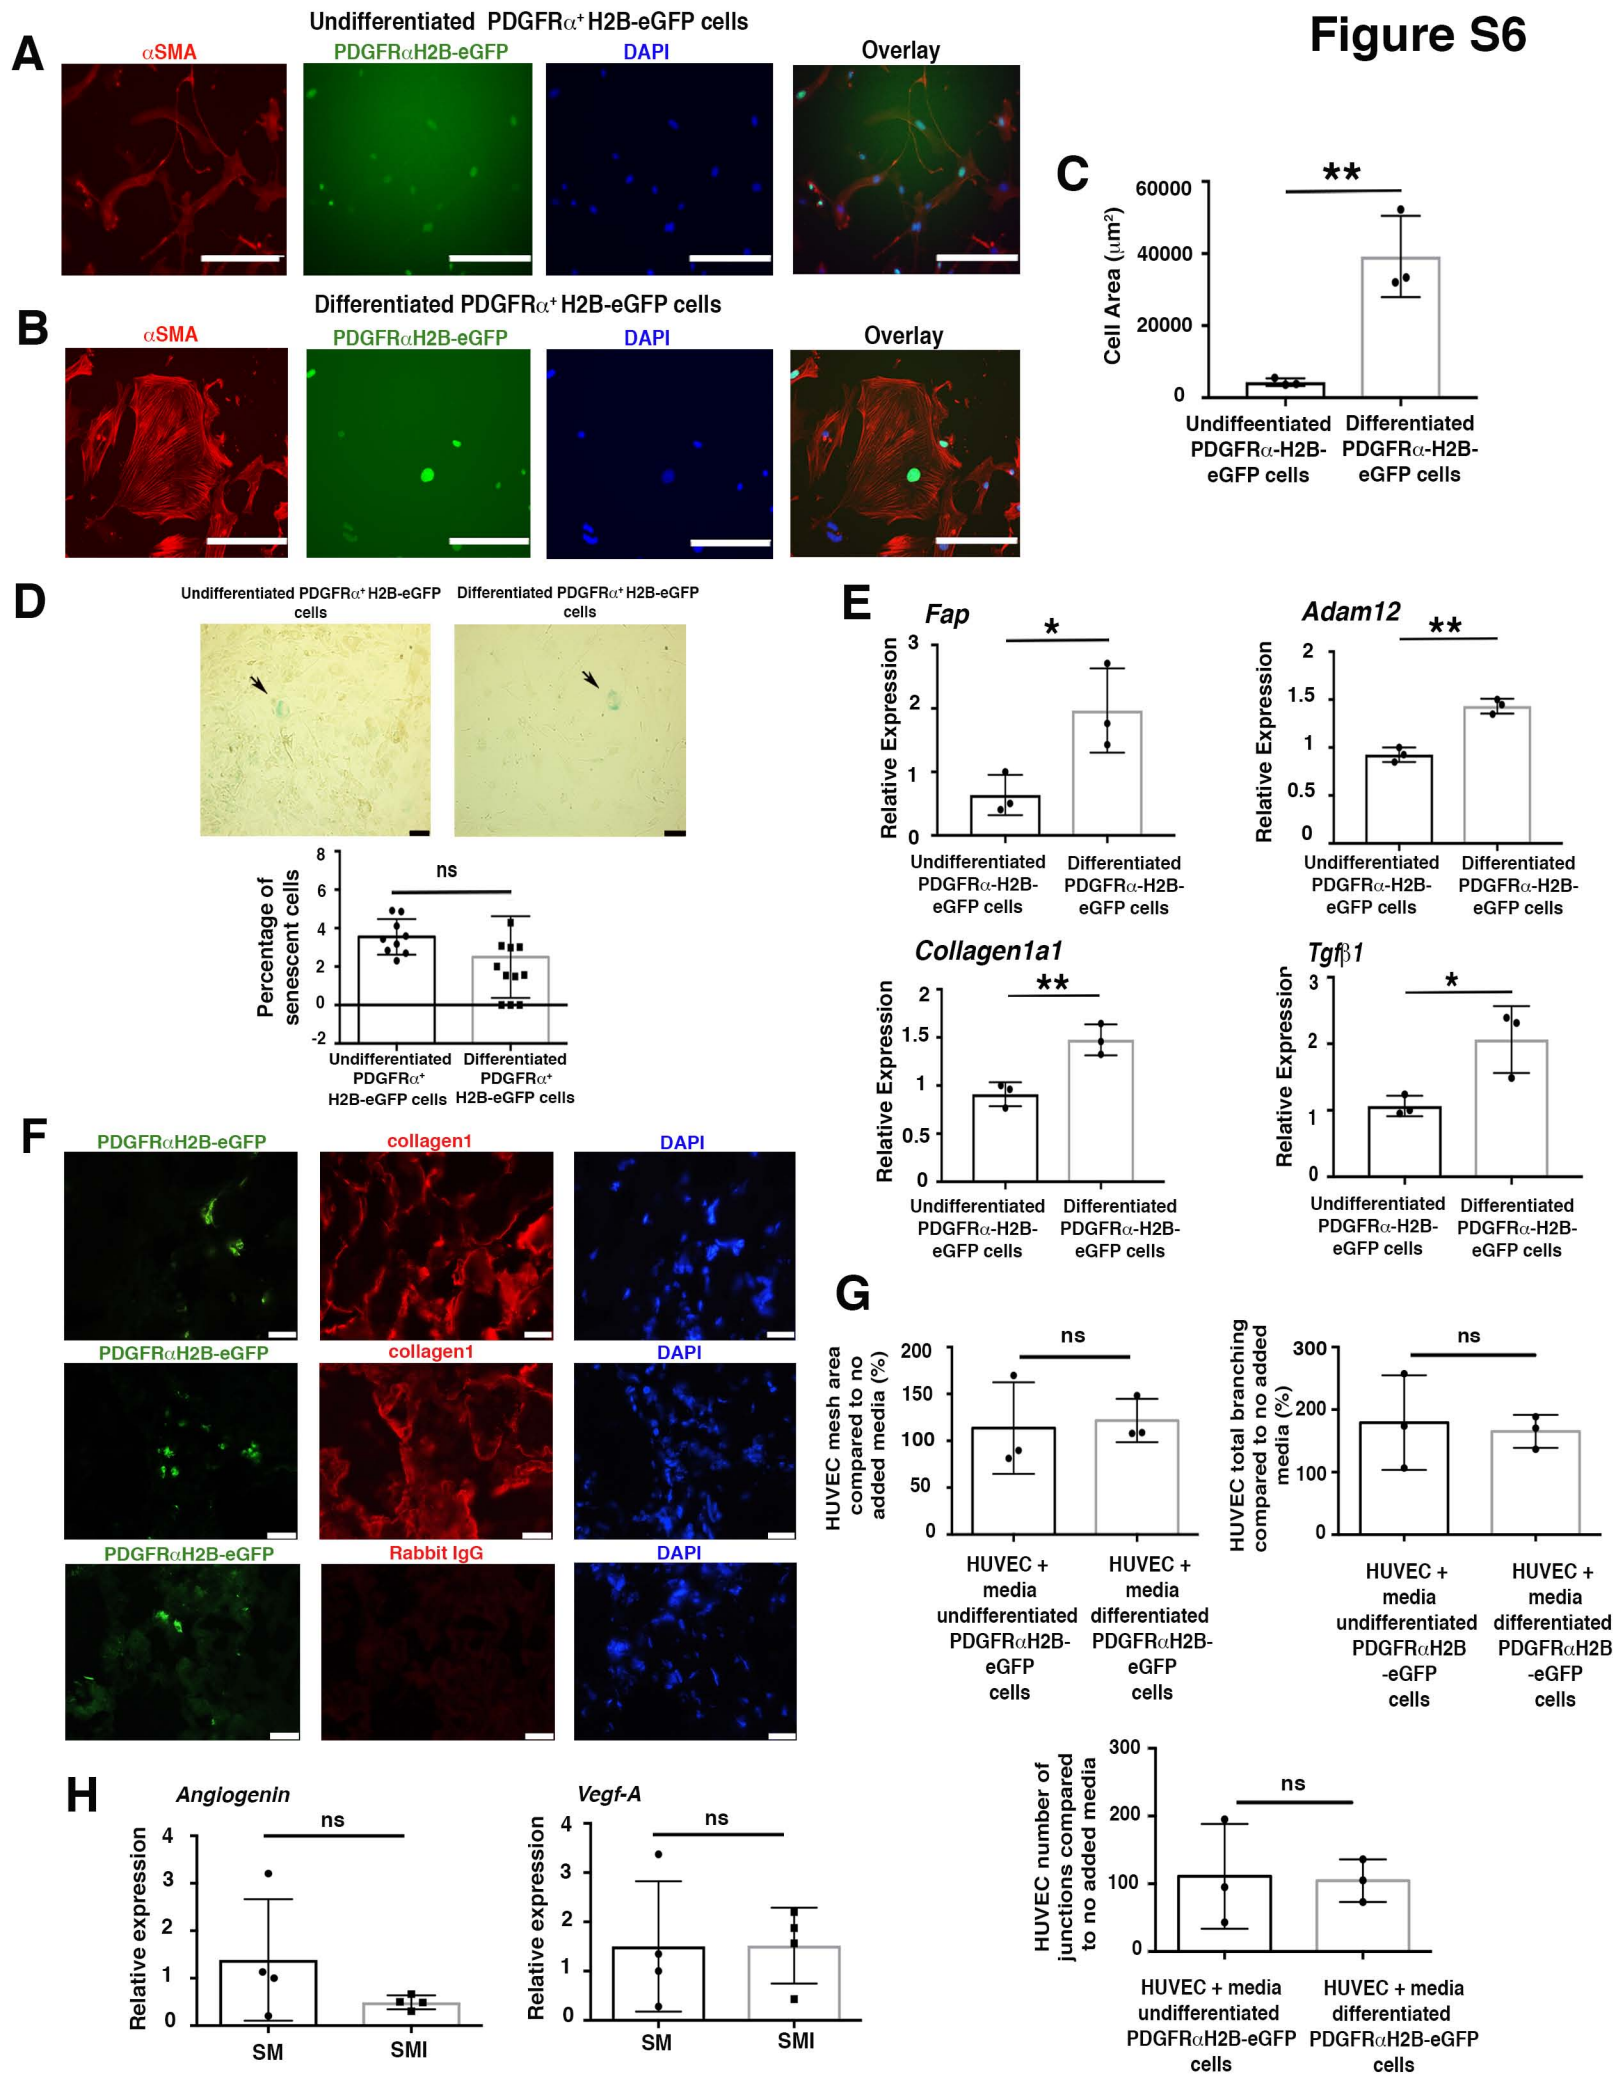

**Figure S6. Function of undifferentiated versus differentiated PDGFR $\alpha$ <sup>+</sup> cells. Related to Figure 6.**

**(A-D)** GFP<sup>+</sup>PDGFR $\alpha$ <sup>+</sup> co-positive cells were FACS-sorted from *PdgfraH2B-eGfp* mice and plated in DMEM supplemented with 10% FBS and grown in either 5% O<sub>2</sub> without passaging (undifferentiated PDGFR $\alpha$ <sup>+</sup> cells) or 20% O<sub>2</sub> and passaged once (differentiated PDGFR $\alpha$ <sup>+</sup> cells). Cells were stained with Cy3-conjugated anti- $\alpha$ SMA antibody at 1:500 dilution for 1 hour at room temperature. Compared to undifferentiated cells **(A)**, differentiated PDGFR $\alpha$ <sup>+</sup> cells exhibited a fine cytoskeletal structure composed of  $\alpha$ SMA fibers **(B)**. Images were acquired with an EVOS AMG cell imaging system (Thermo Fisher Scientific). **(C)** Differentiated PDGFR $\alpha$ <sup>+</sup> cells had a hypertrophied phenotype with increased cell area as measured by ImageJ software. Data are the average of n=3 independent experiments in each cell group. Student's t-test was performed using GraphPad Prism version 6.00. Data represent mean  $\pm$  SD. \*\*P<0.01. **(D)**  $\beta$ -galactosidase activity was assessed by histochemical assay to evaluate senescence in undifferentiated and differentiated GFP<sup>+</sup>PDGFR $\alpha$ <sup>+</sup> co-positive cells. The experimental procedure was performed as suggested by the Manufacturer and described in Star Methods. Senescent cells stain a blue color (black arrows). Scale bar 100 $\mu$ m. The graph represents the percentage of senescent cells per field (each dot represents a different field) in n=3 independent experiments in each condition. Data represent mean  $\pm$  SD and are analyzed by Student's t-test. Data are not significant (ns). **(E)** Quantitative real time PCR of key myofibroblast transcripts for genes involved in ECM remodeling (*Adam12*) and the fibrotic response (*Tgfb1*, *collagen1a1* and *Fap*) comparing differentiated vs undifferentiated PDGFR $\alpha$ <sup>+</sup> cells. 2ng/microliter of amplified cDNA was used in each reaction. Samples were normalized against *18sRNA* transcript levels and relative expression was calculated with the 2<sup>-DDCt</sup> formula. Student's t-test was performed using Prism 6.0. For *Fap* \*P=0.035. For *Adam12* \*\*P=0.0013. For *Collagen1a1* \*\*P=0.0085. For *Tgfb1* \*P=0.03. Data represent mean  $\pm$  SD and are from n=3 independent experiments for both cell types. **(F)** Representative single channel immunofluorescence images are shown and correspond to the merged panels in Figure 6F-H. In brief, we performed adoptive transfer and locally injected differentiated myofibroblast-like GFP<sup>+</sup>PDGFR $\alpha$ <sup>+</sup> cells from *PdgfraH2B-eGfp* mice into young 3 month old nude mice 24 hours after HLI. Tissues were harvested after 21 days. Adductor muscles were frozen in OCT and 8 $\mu$ m sections were labeled overnight with anti-GFP FITC-conjugated antibody and anti-collagen1 polyclonal antibody. Alternatively, control staining for collagen1 was performed using rabbit IgG as primary antibody at the same concentration as the anti-collagen1 antibody. DAPI was used to stain nuclei. Imaging was acquired with a Leica CTR 5500 microscope and DFC340FX camera. Scale bar 20 $\mu$ m in all pictures. **(G)** Quantification, per field, of mesh area (total tube area), total branching (amount of branches expanding from the nodes) and number of junctions (extent of vessel branching) of HUVECs grown in basal media that were then embedded in Matrigel with no added media (comparator group), or conditioned media from cultured undifferentiated versus differentiated GFP<sup>+</sup>PDGFR $\alpha$ <sup>+</sup> cells. Endpoints were assessed after 7 hours in matrigel. ImageJ angiogenesis software was used for quantification. No statistical differences were observed in mesh area (P=0.17), total branching (P=0.59) and number of junctions (P=0.60). Data represent n=3 independent experiments and were compared by Student's t-test. Data represent mean  $\pm$  SD. **(H)**

Quantitative real time PCR of pro-angiogenic transcripts *Angiogenin* and *Vegf-A* *in vivo* in GFP<sup>+</sup>PDGFR $\alpha$ <sup>+</sup> cells under physiological (SM) and ischemic (SMI) hindlimb conditions from *Pdgfra**H2B-eGfp* mice. Analysis of amplified cDNA was performed using Taqman probes specific for the indicated genes (Thermo Fisher Scientific). Data represent n=4 independent experiments and were compared by Student's t-test. Data are not significant (ns) and represent mean  $\pm$  SD. For *Angiogenin* P=0.21 and for *Vegf-A* P=0.98.

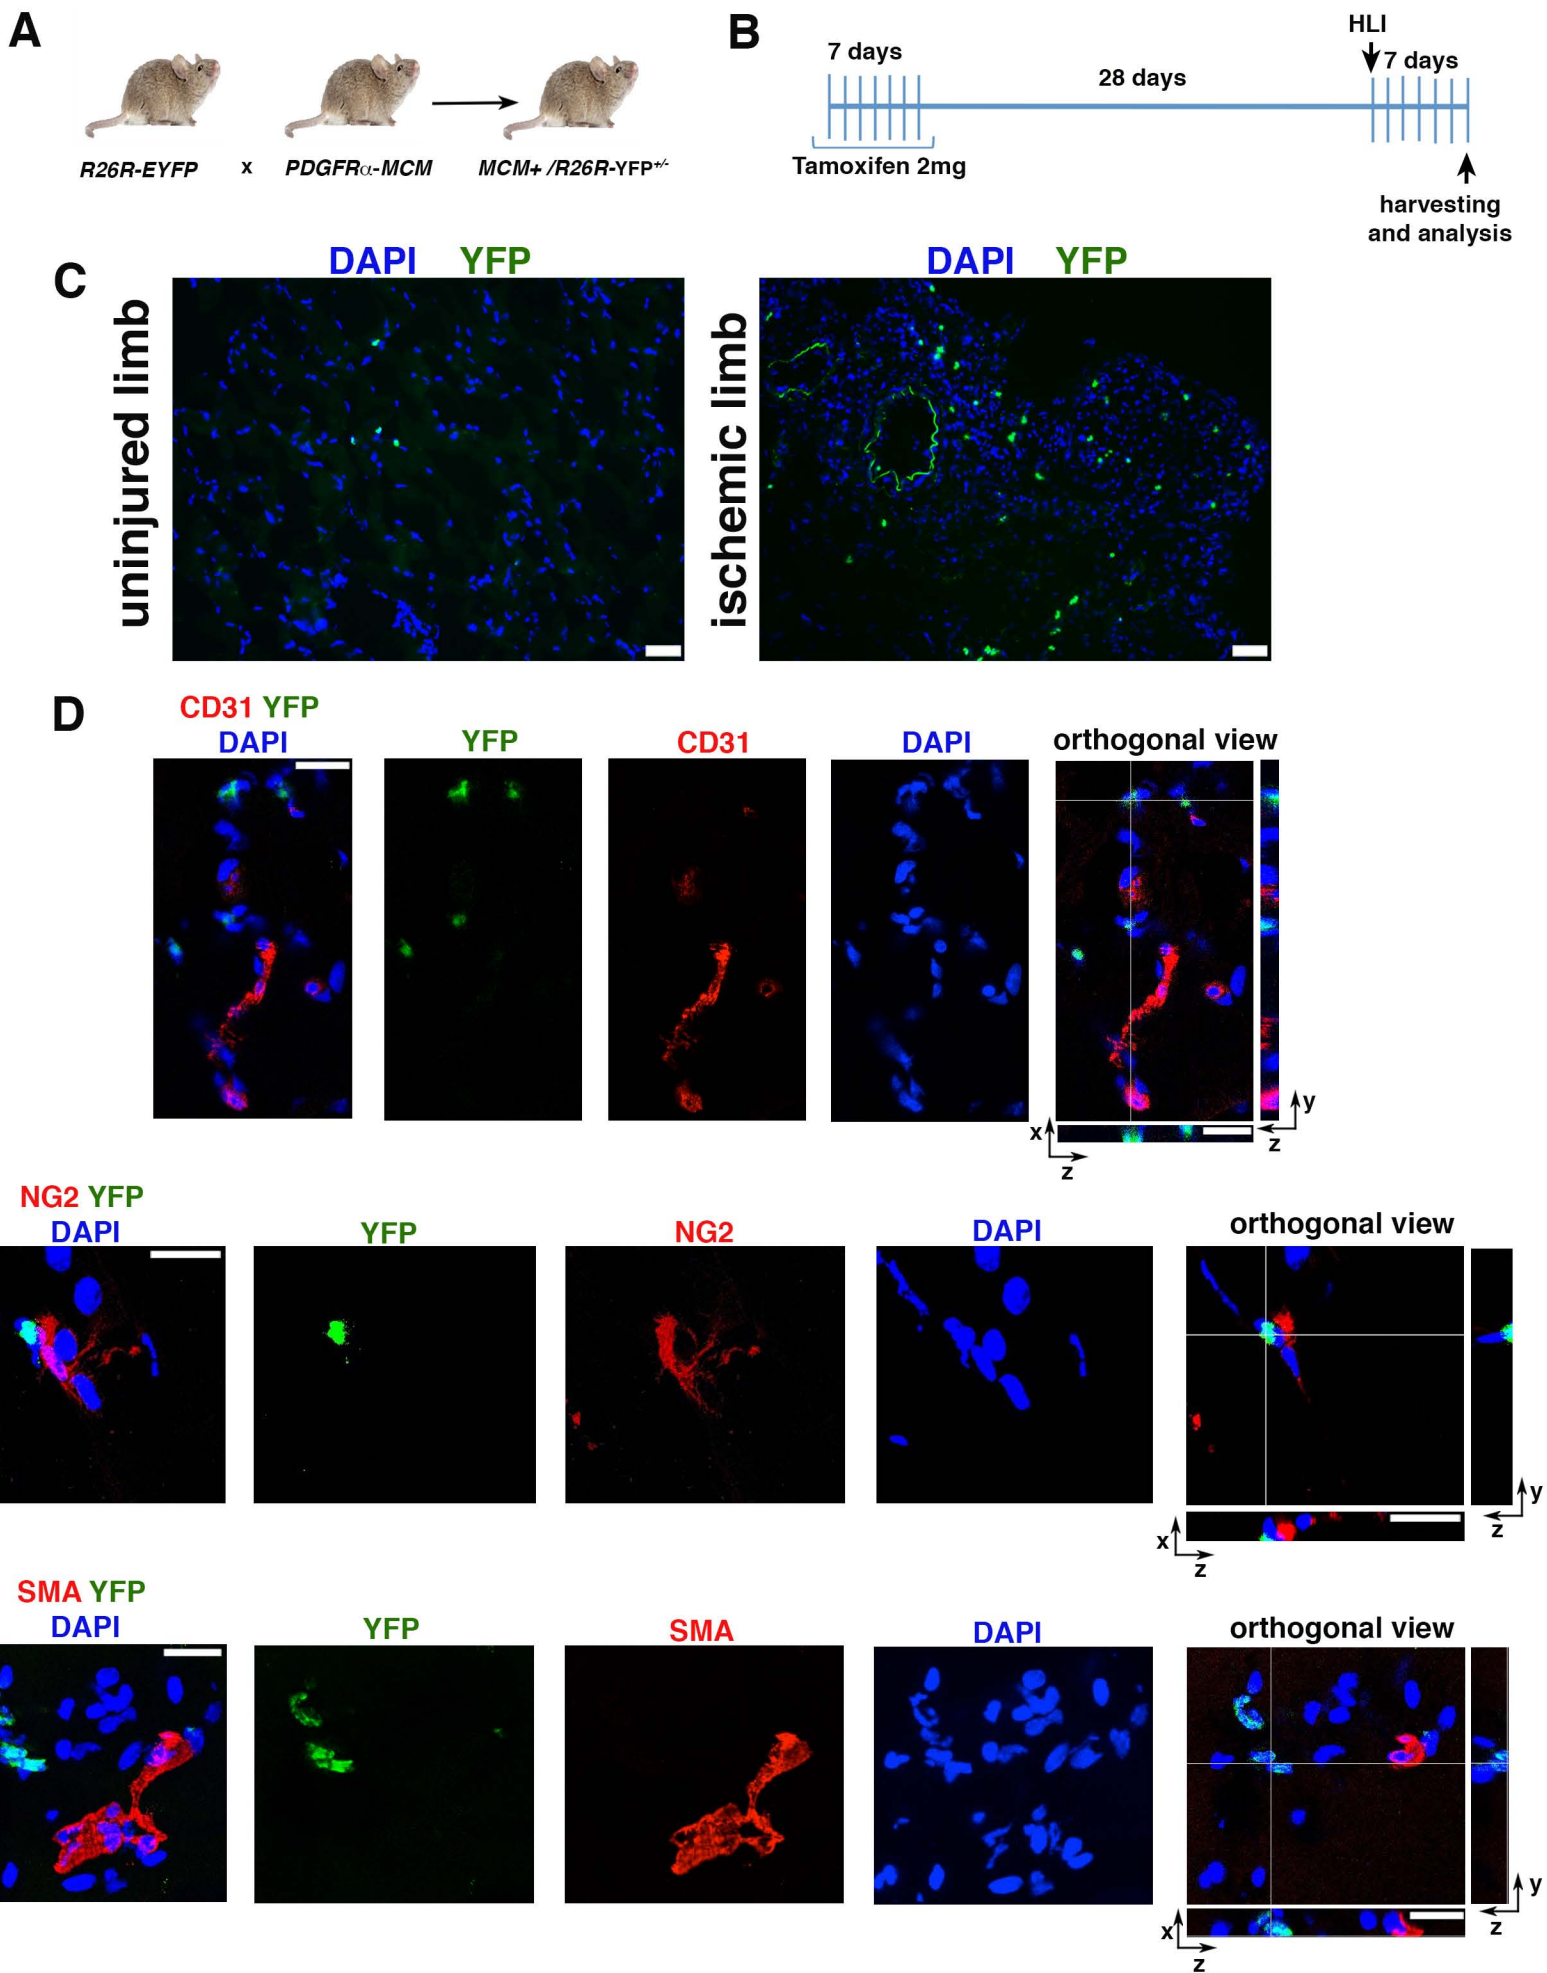

**Figure S7. Lineage tracing of PDGFR $\alpha$ <sup>+</sup> cells in physiological conditions in adult skeletal muscle.**

**Related to Figures 7 and S8. (A)** Breeding strategy to generate *MCM<sup>+</sup>/R26R-YFP<sup>+/-</sup>* mice harboring a knockin for *CreER* in the *Pdgfra* locus. **(B)** To induce YFP expression in PDGFR $\alpha$ <sup>+</sup> cells, *MCM<sup>+</sup>/R26R-YFP<sup>+/-</sup>* mice were treated with tamoxifen as indicated. HLI was performed 28 days after the final tamoxifen injection, and sample collection was performed 7 days after HLI. Apart from (C), results following HLI are presented in Figure S8. **(C)** Representative immunofluorescent analysis of *MCM<sup>+</sup>/R26R-YFP<sup>+/-</sup>* mice in uninjured control limb (left panel) and ischemic limb (HLI, right panel). In uninjured (control) mice there were scattered YFP<sup>+</sup> cells present (left panel). Following HLI (right panel) we observed a significant increase in the number of YFP<sup>+</sup> cells in the injured area (the green circular structure is auto-fluorescent signal from the elastic lamina of a small artery). Scale bars are 50 $\mu$ m. Images were acquired with a Leica DMI8, Application Suite X and DCM2900 camera. **(D)** Confocal z-stacked images of tamoxifen-induced control *MCM<sup>+</sup>/R26R-YFP<sup>+/-</sup>* mice without HLI, showing no co-positive staining between YFP and CD31. Corresponding x-y, x-z and y-z orthogonal views represent overlays of the three fluorescent channels (green, blue and red) and were snapshot in specific z-stack layers displaying potential co-staining events. Measurements for the orthogonal views are as follows: 132.5x4.6 $\mu$ m for y-z axes and 74.8x4.6 $\mu$ m for x-z axes. **(E)** Confocal z-stacked images of tamoxifen-induced control *MCM<sup>+</sup>/R26R-YFP<sup>+/-</sup>* mice without HLI showing no co-positive staining between YFP and NG2, including the corresponding orthogonal views as described above. Measurements for the orthogonal views are: 62.7x7.2 $\mu$ m for y-z axes and 75x7.2 $\mu$ m for x-z axes. **(F)** Confocal z-stacked images of tamoxifen-induced control *MCM<sup>+</sup>/R26R-YFP<sup>+/-</sup>* mice without HLI showing no co-positive staining between YFP and  $\alpha$ SMA, including corresponding orthogonal views. Measurements for the orthogonal views are: 94.8x14.2 $\mu$ m for y-z axes and 110.9x14.2 $\mu$ m for x-z axes. Grid lines across all orthogonal images show the cross-sectional coordinates where YFP<sup>+</sup> cells were analyzed for stromal and vessel marker co-expression. Orthogonal views were reconstructed from the acquired z-stacks using Fiji. Images in panels D-F were acquired with Leica SP5 DM confocal microscope, with all sections being of 10 $\mu$ m in thickness and scale bars 20 $\mu$ m. GFP-FITC, CD31, NG2 and  $\alpha$ SMA-CY3 antibodies were used as indicated in Star Methods. For Figures S7 and S8, images are representative of analyses performed in 4 independent mice for each condition.



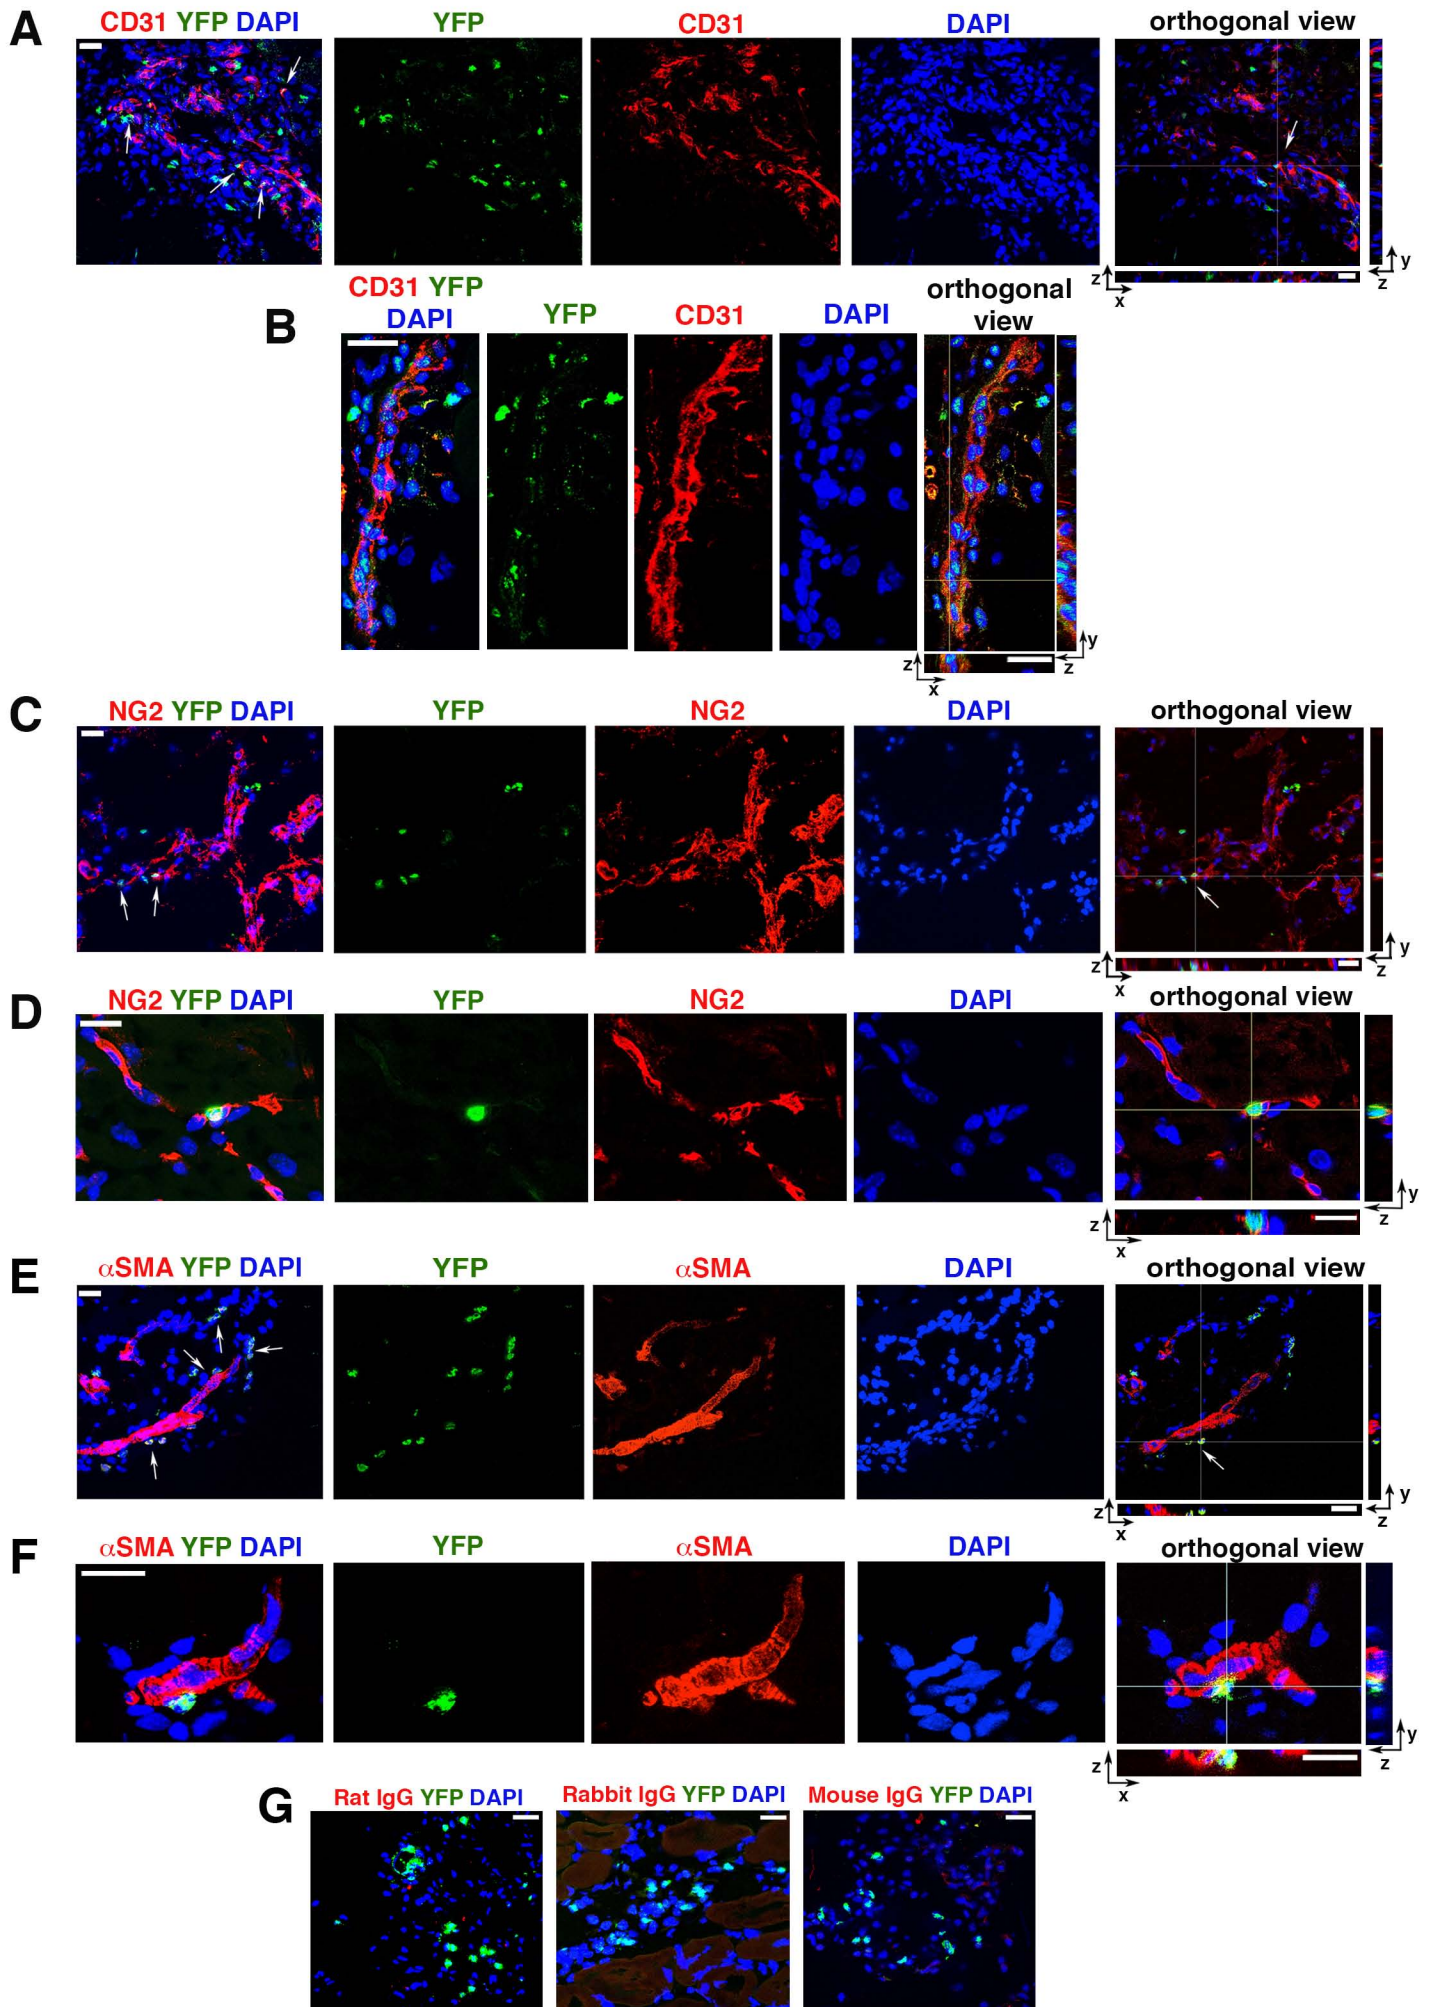

**Figure S8. PDGFR $\alpha$ <sup>+</sup> cells are present in the stromal and vascular compartments after ischemic insult in adult skeletal muscle. Related to Figures 7 and S7.** As shown in Figure S7, *MCM<sup>+</sup>/R26R-YFP<sup>+/-</sup>* mice harboring a knockin for *CreER* in the *Pdgfra* locus received tamoxifen and HLI was performed 28 days after final tamoxifen injection. Sample collection was performed 7 days after HLI. Results from uninjured (control) mice are presented in Figure S7. 3D-microscopy images are presented as overlays, single color images, and as x-y, x-z and y-z orthogonal views (as per Figure S7). Orthogonal views were reconstructed from the acquired z-stacks using Fiji. Grid lines across all orthogonal images show the cross-sectional coordinates where YFP<sup>+</sup> cells were analyzed for stromal and vessel marker co-expression. All sections are 10 $\mu$ m in thickness and all scale bars are 20 $\mu$ m. Confocal images were acquired as z-stacks with a Leica SP5 DM microscope. GFP-FITC, CD31, NG2 and  $\alpha$ SMA-CY3 antibodies were used as indicated in Star Methods. For low power views, arrows are used to indicate co-positive cells. **(A)** low and **(B)** high power views showing YFP and CD31 co-expression after HLI. Measurements for orthogonal views are: 246.3x8.4 $\mu$ m for y-z and 246.3x8.4 $\mu$ m for x-z axes (low power view), and 169.3x8.4 $\mu$ m for y-z and 66.4x8.4 $\mu$ m for x-z axes (high power view). **(C)** low and **(D)** high power views showing YFP and NG2 co-expression after HLI. Measurements for orthogonal views are: 246.3x8.9 $\mu$ m for y-z and 246.3x8.9 $\mu$ m for x-z axes (low power view), and 81.77x10.3 $\mu$ m for y-z and 105.8x10.3 $\mu$ m for x-z axes (high power view). **(E)** low and **(F)** high power views showing YFP and  $\alpha$ SMA co-expression after HLI. Measurements for orthogonal views are: 246.3x10.1 $\mu$ m for y-z and 246.3x10.1 $\mu$ m for x-z axes (low power view), and 57.7x8.9 $\mu$ m for y-z and 72.8x8.9 $\mu$ m for x-z axes (high power view). **(G)** Z-stack images of control immunoglobulins for CD31 (Rat IgG), NG2 (Rabbit IgG) and  $\alpha$ SMA (Mouse IgG). Staining was performed with IgG control antibodies as described in Star Methods.

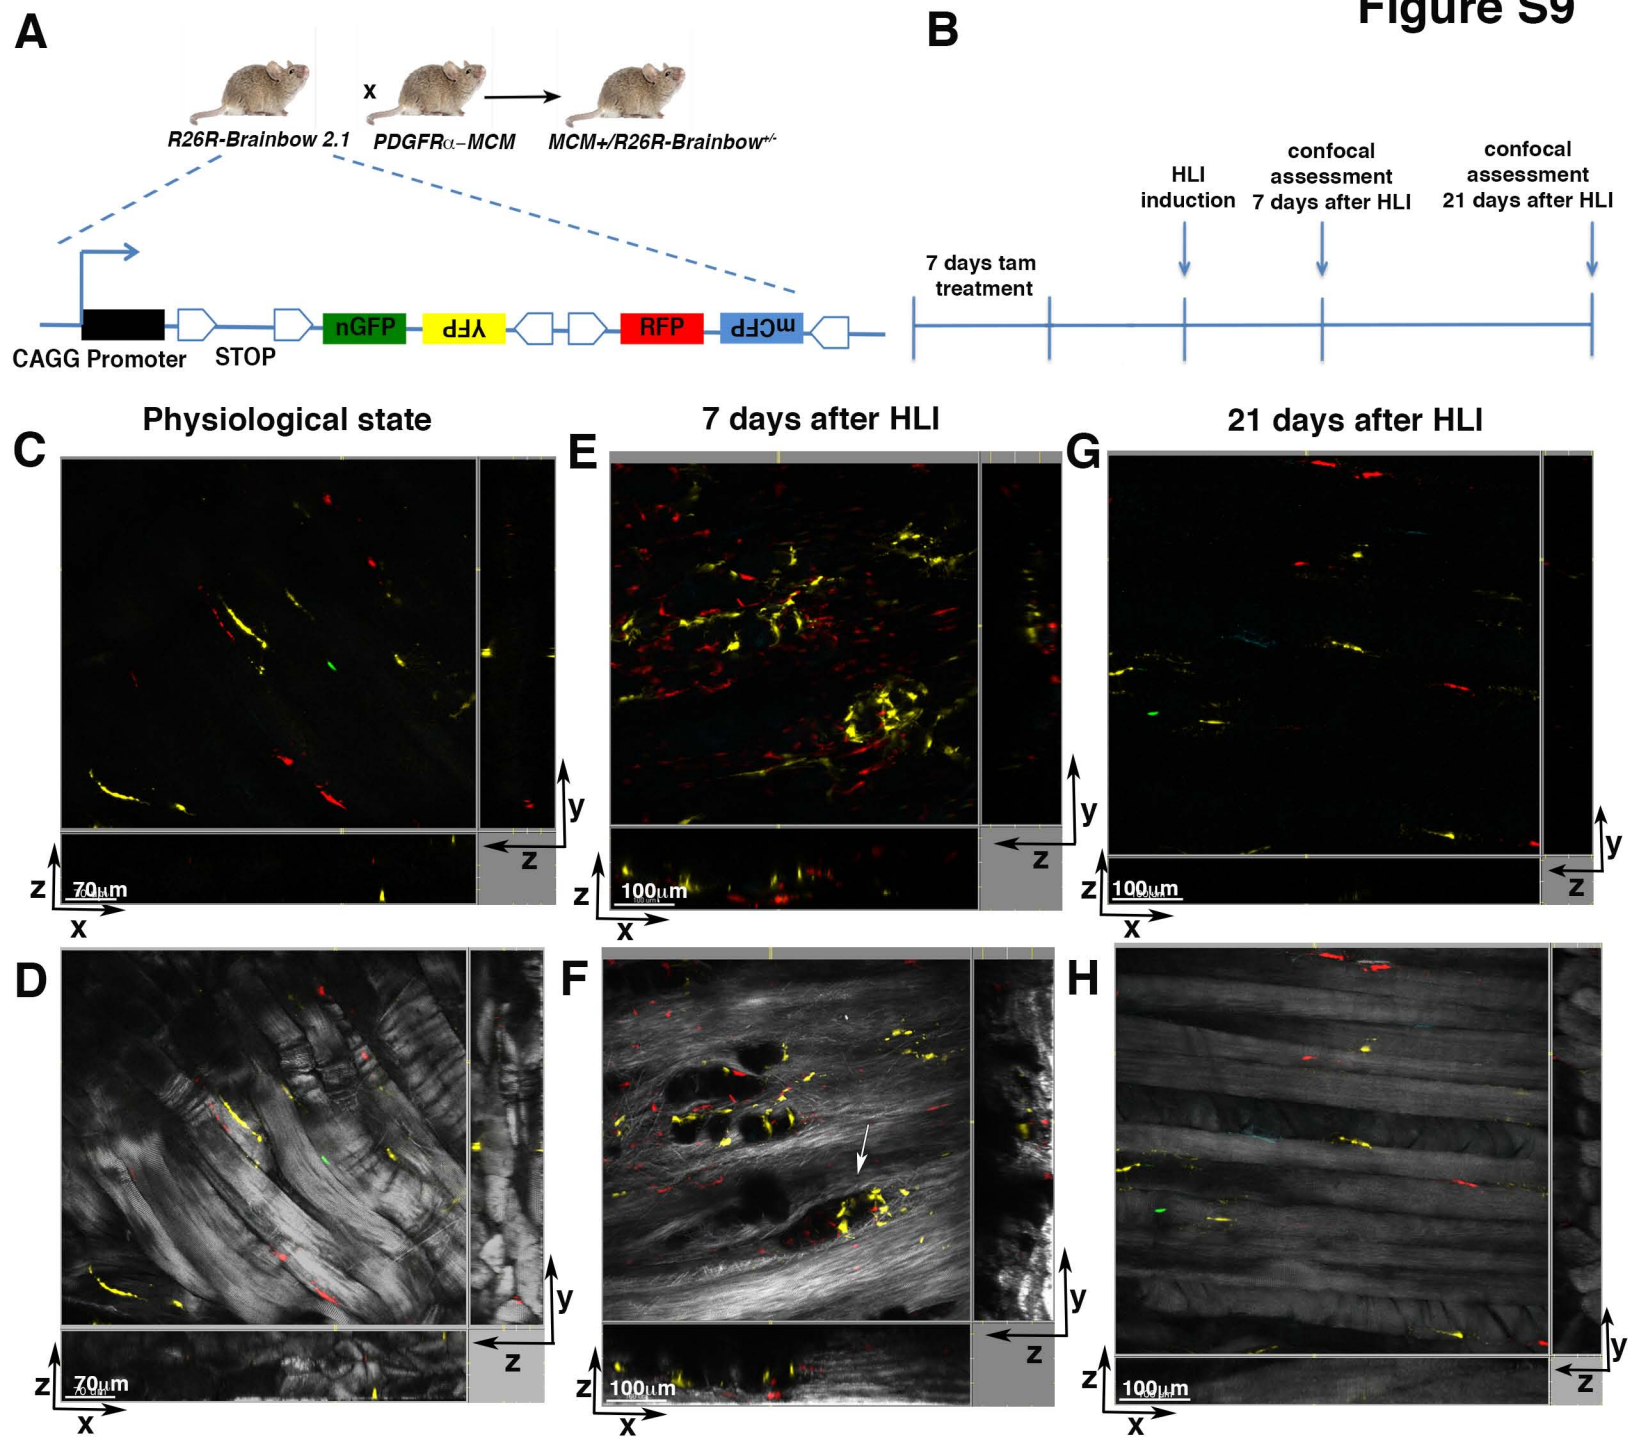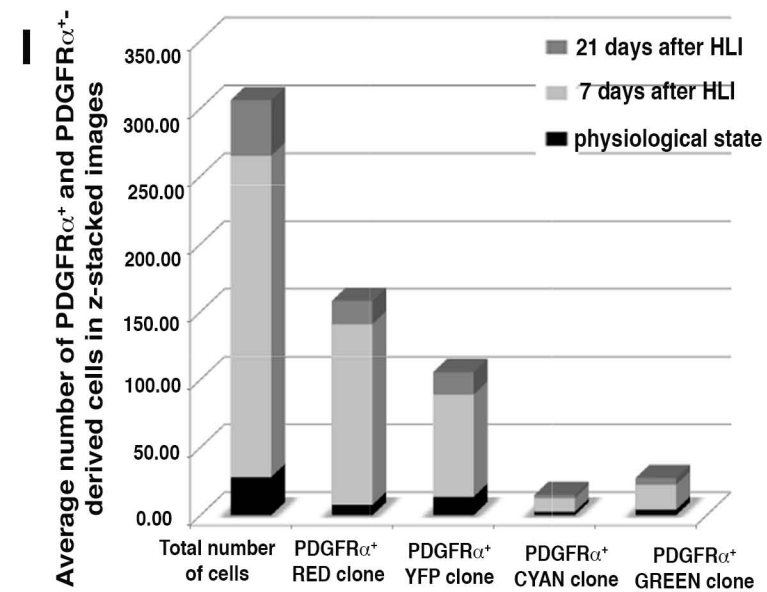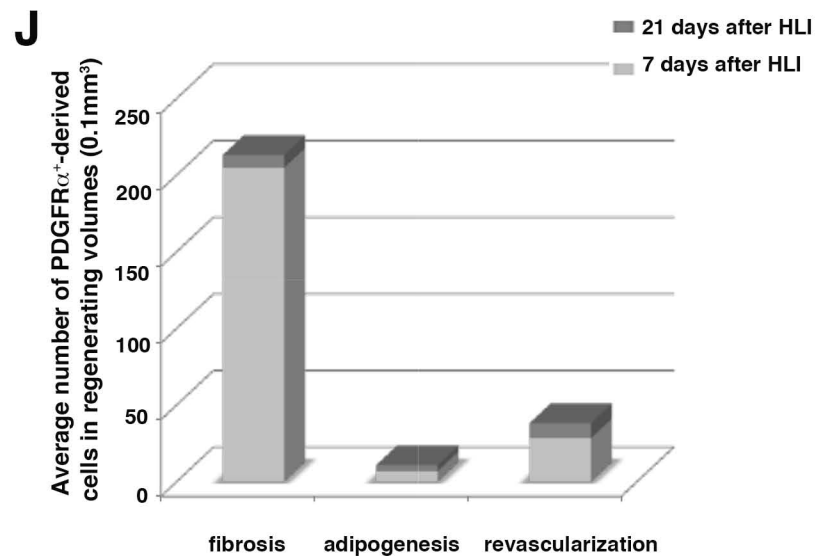

**Figure S9. PDGFR $\alpha$ <sup>+</sup>-derived cells undergo expansion after ischemia-induction. Related to Figure 7.**

**(A)** Breeding strategy to generate *MCM<sup>+</sup>/R26R-Brainbow<sup>+/+</sup>* mice where PDGFR $\alpha$ <sup>+</sup> cells and their progeny permanently express one of four fluorescent proteins. The Brainbow 2.1 region contains two *loxP*-flanked dimers, positioned head-to-tail in tandem. One dimer has nuclear-localized green fluorescent protein (nGFP) and a reverse-oriented cytoplasmic yellow fluorescent protein (YFP). The other dimer has cytoplasmic red fluorescent protein (RFP) and a reverse-oriented membrane-cyan fluorescent protein (mCFP). **(B)** Tamoxifen treatment to activate PDGFR $\alpha$ -Cre-mediated recombination of the Brainbow cassette. Tam, tamoxifen. Tamoxifen was administered for 7 consecutive days and HLI was induced 4-5 days after last injection of tamoxifen. Two-photon confocal microscopy was performed on uninjured hindlimbs (physiological state) and at 7 and 21 days after HLI. **(C-H)** 3D-microscopy images are presented as x-y, x-z and y-z views. Paired images of the overlaid four fluorescent channels alone (C, E, G; pseudocolored in cyan for CFP, green for GFP, yellow for YFP, red for RFP) and the corresponding merged-second harmonic generation (SHG, white) images (D, F, H) are displayed. All four fluorescent Brainbow recombined PDGFR $\alpha$ <sup>+</sup> clones were observed in physiological (uninjured) conditions (C, D) aligned along skeletal muscle fibers. 7 days after HLI, expansion of PDGFR $\alpha$ <sup>+</sup> cells occurred in the CFP<sup>+</sup>, GFP<sup>+</sup>, YFP<sup>+</sup> and RFP<sup>+</sup> clones (E, F, I), that were found to be distributed between the ischemic skeletal muscle fibers and vessels (F). PDGFR $\alpha$ <sup>+</sup> cells showed cell-cell and cell-matrix interactions and were associated with vessel-like structures (F, white arrow). 21 days after HLI (G, H), PDGFR $\alpha$ <sup>+</sup> cells re-established their original (physiological uninjured) environmental niche in most of the regenerated muscle (H). Images are representative of analyses performed in different locations in 3 independent mice in each condition (physiological state, and, 7 and 21 days after HLI induction) as described in Star Methods. Scale bars as indicated. **(I)** Quantification of the average number of PDGFR $\alpha$ <sup>+</sup> and PDGFR $\alpha$ <sup>+</sup>-derived cells in uninjured tissue and during regeneration after HLI (7 and 21 days). Each cell expressing a single fluorescent protein was automatically segmented as a surface object using Imaris software as described in Star Methods. Lineage-tracked cells were counted in 3 z-stack images for each mouse in different areas of the skeletal muscle for the different conditions (uninjured, 7 and 21 days after HLI, n=3 for each of these conditions). **(J)** The average number of PDGFR $\alpha$ <sup>+</sup>-derived cells present in injured and regenerating areas was quantified in n=3 independent mice at each time point after HLI (7 and 21 days) using SHG images to distinguish fibrotic, adipocytic and revascularized areas. Quantification was performed by counting PDGFR $\alpha$ <sup>+</sup>-derived fluorescent cells present in z-stacked images per 0.1mm<sup>3</sup> volume as described in Star Methods.

Figure S10

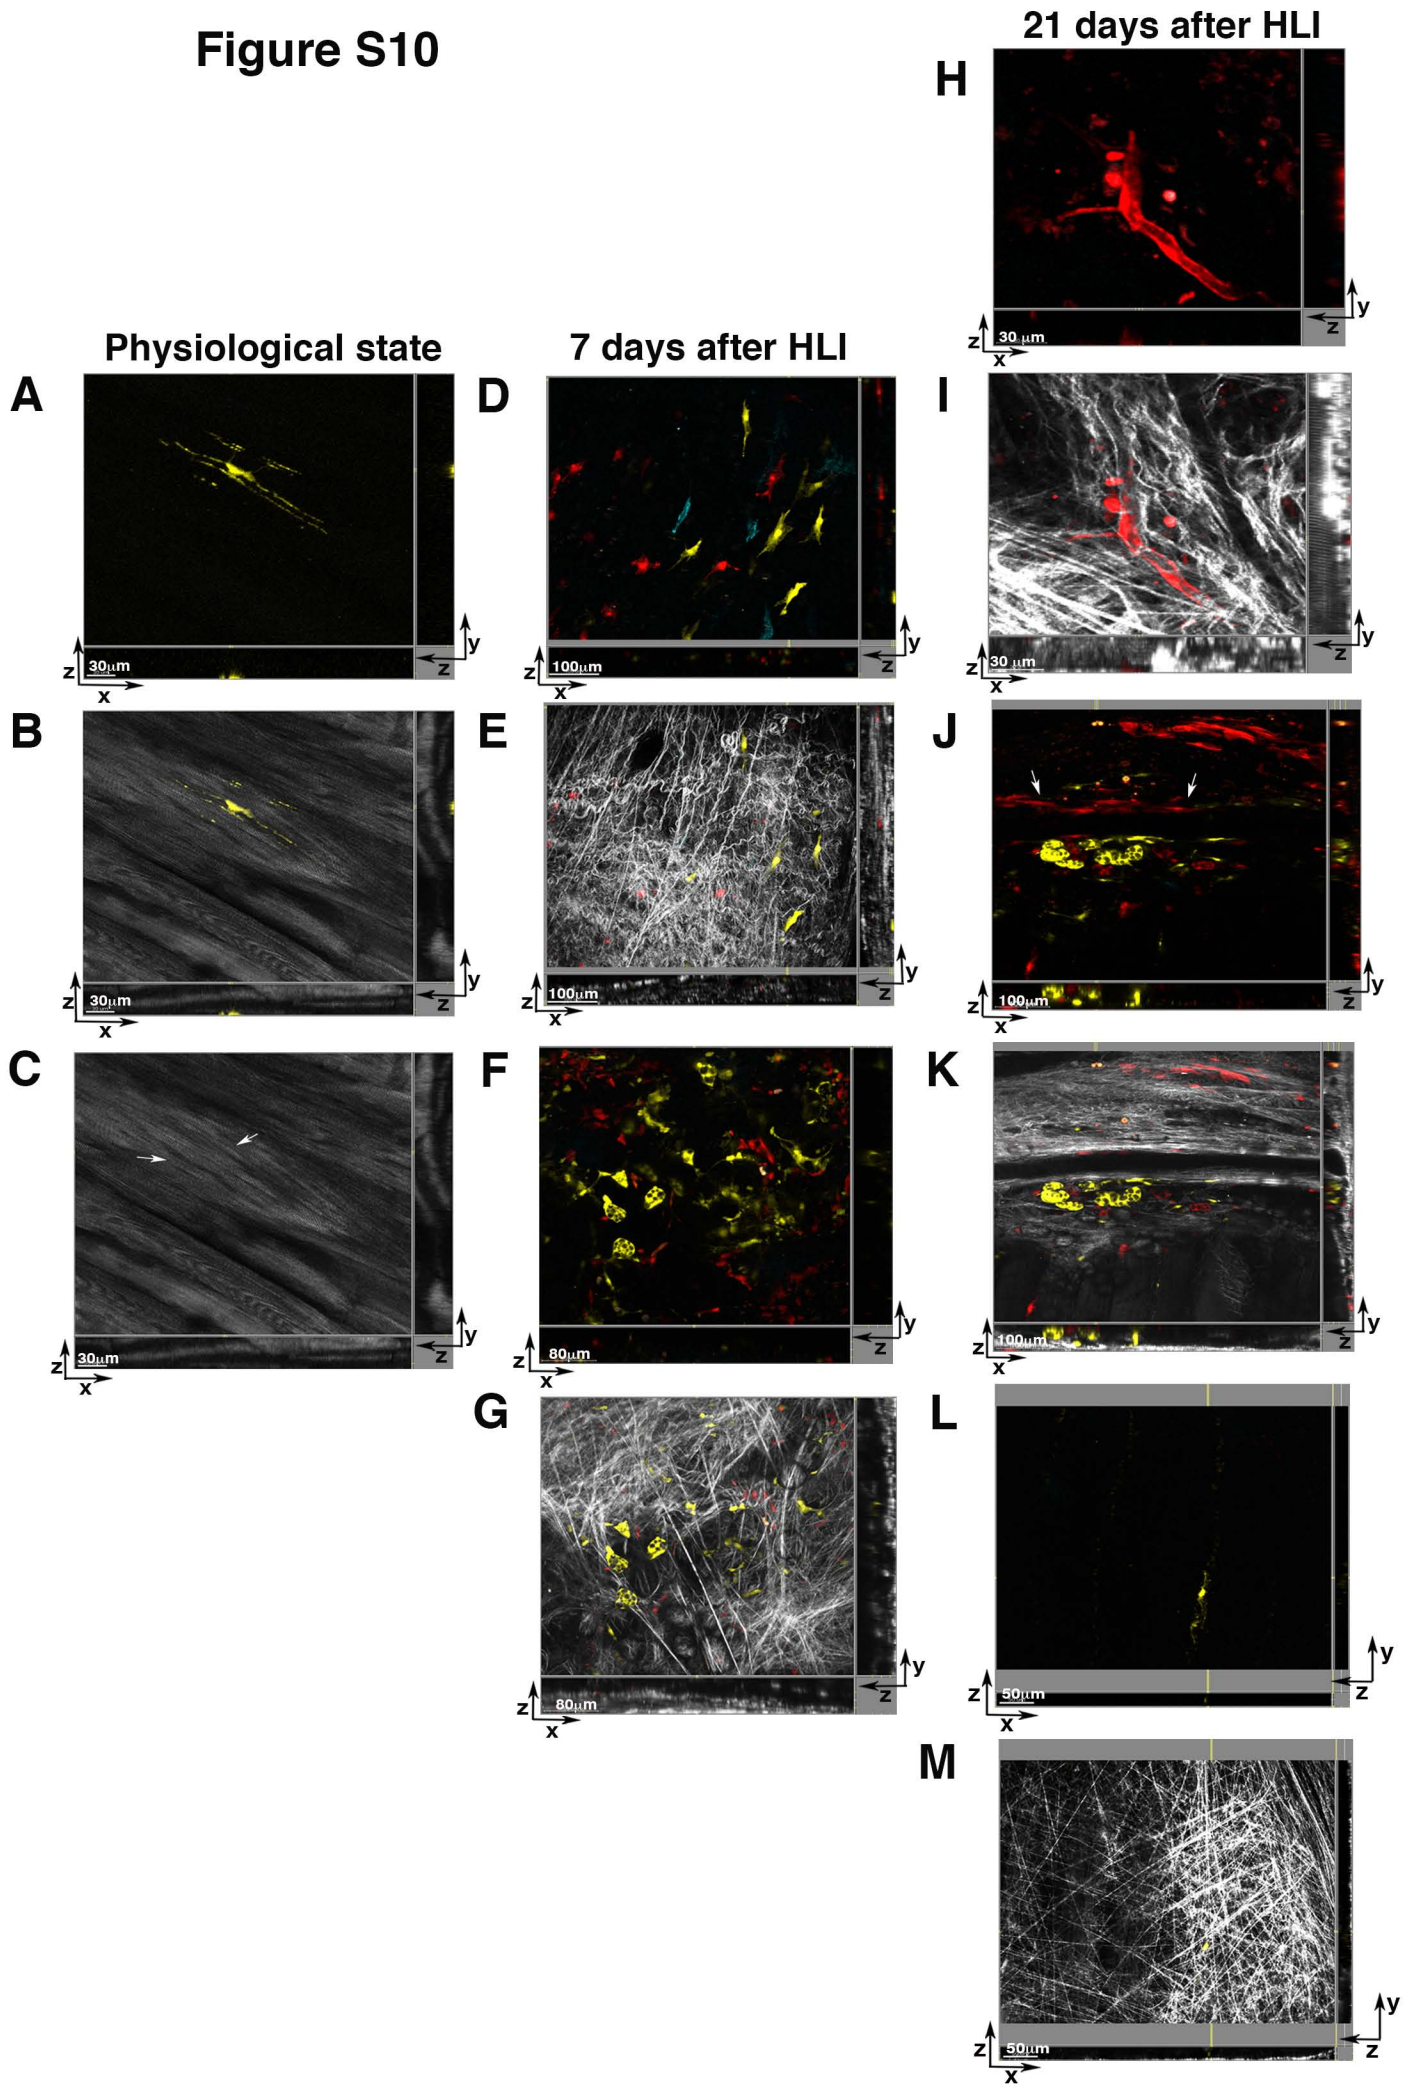

**Figure S10. PDGFR $\alpha$ <sup>+</sup> cells differentiate into different stromal lineages. Related to Figure 7.**

**(A-C)** Using *MCM<sup>+</sup>/R26R-Brainbow<sup>+/+</sup>* mice, we observed that in the physiological (uninjured) state PDGFR $\alpha$ <sup>+</sup> cells were aligned along small capillaries running between skeletal muscle fibers. (A) and (C) represent the fluorescent and SHG x-y-z images, respectively, while (B) is an overlay of these. **(D-E)** Fluorescent (D) and SHG/fluorescent overlay (E) of PDGFR $\alpha$ <sup>+</sup>-derived cells in a fibrotic area 7 days after HLI. Images show the contribution of RFP<sup>+</sup>, YFP<sup>+</sup> and CFP<sup>+</sup> cells to the fibrotic volume. **(F-G)** Fluorescent (F) and SHG/fluorescent overlay (G) x-y-z images of PDGFR $\alpha$ <sup>+</sup>-derived cells showing contribution to brown adipose tissue 7 days after HLI. **(H-I)** Fluorescent (H) and SHG/fluorescent overlay (I) x-y-z images of PDGFR $\alpha$ <sup>+</sup>-derived cells showing their contribution to new vessel formation in areas of tissue remodeling 21 days after HLI. **(J-K)** Fluorescent (J) and SHG/fluorescent overlay (K) x-y-z images of PDGFR $\alpha$ <sup>+</sup>-derived cells showing contribution to vessels (arrows) and adipose tissue in an area of tissue remodeling 21 days after HLI induction. **(L-M)** Fluorescent (L) and SHG/fluorescent overlay (M) x-y-z images of PDGFR $\alpha$ <sup>+</sup>-derived cells showing a marked reduction in their contribution to remaining fibrotic areas at 21 days after HLI. All images were analyzed with Imaris x64 software version 8.4 and are representative of analyses performed in different locations in n=3 independent mice in each condition (physiological state, and, 7 and 21 days after HLI induction) as described in Star Methods. Scale bars as indicated.

**Table S2. Related to Figure 5 and Figure S5.** Analysis of Table S1 gene list (differentially expressed genes from GFP<sup>+</sup>PDGFR $\alpha$ <sup>+</sup> co-positive cells isolated from uninjured hindlimbs versus 7 days after HLI) according to the Molecular Signature data base (mSigDB) showing all significantly activated signatures.

| Class                      | Gene Set                                                | Gene Set Size | Expected Hits | Observed Hits | OR          | Pvalue   |
|----------------------------|---------------------------------------------------------|---------------|---------------|---------------|-------------|----------|
| mSigDB c2                  | NABA_MATRISOME                                          | 587           | 12.81973476   | 57            | 4.44626984  | 6.18E-22 |
| mSigDB c2                  | BOQUEST_STEM_CELL_CULTURED_VS_FRESH_UP                  | 352           | 7.687472971   | 44            | 5.72359736  | 2.75E-21 |
| Mouse_Gene_Atlas           | osteoblast_day21                                        | 219           | 4.782831195   | 28            | 5.854273099 | 4.02E-14 |
| mSigDB c2                  | NABA_CORE_MATRISOME                                     | 195           | 4.258685311   | 26            | 6.105170517 | 1.25E-13 |
| mSigDB c2                  | LEE_BMP2_TARGETS_UP                                     | 636           | 13.88986594   | 46            | 3.311767026 | 5.99E-13 |
| mSigDB c2                  | WONG_ADULT_TISSUE_STEM_MODULE                           | 601           | 13.12548652   | 44            | 3.35225669  | 1.34E-12 |
| Mouse_Gene_Atlas           | osteoblast_day14                                        | 239           | 5.219619432   | 27            | 5.172790919 | 2.37E-12 |
| mSigDB c2                  | LIM_MAMMARY_STEM_CELL_UP                                | 403           | 8.801282975   | 34            | 3.863073156 | 1.32E-11 |
| mSigDB c2                  | BOQUEST_STEM_CELL_UP                                    | 230           | 5.023064725   | 25            | 4.977041182 | 3.73E-11 |
| mSigDB c2                  | CHIARADONNA_NEOPLASTIC_TRANSFORMATION_CDC25_UP          | 113           | 2.467853539   | 18            | 7.293787786 | 4.01E-11 |
| Mouse_Gene_Atlas           | umbilical_cord                                          | 114           | 2.489692951   | 18            | 7.229807191 | 4.67E-11 |
| mSigDB c2                  | SARRIO_EPITHELIAL_MESENCHYMAL_TRANSITION_DN             | 116           | 2.533371775   | 18            | 7.105155343 | 6.30E-11 |
| mSigDB c2                  | NABA_ECM_GLYCOPROTEINS                                  | 139           | 3.035678247   | 19            | 6.258897832 | 1.77E-10 |
| GO_Cellular_Component_2013 | extracellular region part (GO:0044421)                  | 248           | 5.416174139   | 25            | 4.615804322 | 1.91E-10 |
| mSigDB c2                  | CHEN_LVAD_SUPPORT_OF_FAILING_HEART_UP                   | 81            | 1.76899236    | 15            | 8.479403496 | 1.93E-10 |
| mSigDB c2                  | NABA_MATRISOME_ASSOCIATED                               | 392           | 8.561049445   | 31            | 3.621051391 | 5.61E-10 |
| mSigDB c2                  | OSWALD_HEMATOPOIETIC_STEM_CELL_IN_COLLAGEN_GEL_UP       | 193           | 4.215006487   | 21            | 4.982198738 | 1.42E-09 |
| mSigDB c2                  | ONDER_CDH1_TARGETS_2_UP                                 | 224           | 4.892028254   | 22            | 4.497112211 | 3.98E-09 |
| mSigDB c2                  | CHICAS_RB1_TARGETS_CONFLUENT                            | 479           | 10.46107828   | 33            | 3.154550528 | 5.06E-09 |
| mSigDB c2                  | SCHUETZ_BREAST_CANCER_DUCTAL_INVASIVE_UP                | 298           | 6.508144731   | 25            | 3.84134051  | 8.73E-09 |
| mSigDB c2                  | SWEET_LUNG_CANCER_KRAS_DN                               | 353           | 7.709312383   | 27            | 3.502257875 | 1.57E-08 |
| mSigDB c2                  | GERY_CEBP_TARGETS                                       | 113           | 2.467853539   | 15            | 6.078156488 | 2.29E-08 |
| mSigDB c2                  | SEKI_INFLAMMATORY_RESPONSE_LPS_UP                       | 69            | 1.506919418   | 12            | 7.963265892 | 2.75E-08 |
| mSigDB c2                  | GAJATE_RESPONSE_TO TRABECTEDIN UP                       | 56            | 1.223007064   | 11            | 8.994224422 | 2.79E-08 |
| mSigDB c2                  | SMID_BREAST_CANCER_LUMINAL_B_DN                         | 354           | 7.731151795   | 26            | 3.363017658 | 6.65E-08 |
| mSigDB c2                  | TURASHVILI_BREAST_LOBULAR_CARCINOMA_VS_DUCTAL_NORMAL_UP | 61            | 1.332204123   | 11            | 8.256992912 | 7.12E-08 |
| mSigDB c2                  | ANASTASSIOU_CANCER_MESENCHYMAL_TRANSITION_SIGNATURE     | 61            | 1.332204123   | 11            | 8.256992912 | 7.12E-08 |
| mSigDB c2                  | HAN_SATBI_TARGETS_UP                                    | 313           | 6.835735909   | 24            | 3.510960681 | 9.75E-08 |
| mSigDB c2                  | WESTON_VEGFA_TARGETS                                    | 80            | 1.747152948   | 12            | 6.868316832 | 1.51E-07 |
| mSigDB c2                  | SERVITJA_ISLET_HNF1A_TARGETS_UP                         | 130           | 2.83912354    | 15            | 5.28332064  | 1.53E-07 |
| Reactome_2015              | Extracellular matrix organization                       | 213           | 4.651794724   | 19            | 4.084445064 | 2.17E-07 |
| mSigDB c2                  | GAUSSMANN_MLL_AF4_FUSION_TARGETS_E_UP                   | 84            | 1.834510595   | 12            | 6.541254125 | 2.63E-07 |
| mSigDB c2                  | LINDVALL_IMMORTALIZED_BY_TERT_DN                        | 69            | 1.506919418   | 11            | 7.299660401 | 2.66E-07 |
| mSigDB c2                  | NUYTEN_EZH2_TARGETS_UP                                  | 859           | 18.76005478   | 43            | 2.292104181 | 2.76E-07 |
| mSigDB c5                  | EXTRACELLULAR_REGION_PART                               | 197           | 4.302364134   | 18            | 4.183746293 | 3.19E-07 |
| mSigDB c2                  | TONKS_TARGETS_OF_RUNX1_RUNX1T1_FUSION_HSC_UP            | 160           | 3.494305896   | 16            | 4.578877888 | 4.31E-07 |
| mSigDB c2                  | PLASARI_TGFB1_TARGETS_10HR_UP                           | 183           | 3.996612368   | 17            | 4.253602409 | 5.39E-07 |
| mSigDB c2                  | CROMER_TUMORIGENESIS_UP                                 | 46            | 1.004612945   | 9             | 8.958674128 | 5.44E-07 |
| mSigDB c2                  | ZHU_CMV_24_HR_DN                                        | 75            | 1.637955889   | 11            | 6.715687569 | 6.36E-07 |

|           |                                                       |      |             |    |             |          |
|-----------|-------------------------------------------------------|------|-------------|----|-------------|----------|
| mSigDB c3 | AACTTT UNKNOWN                                        | 1409 | 30.7717313  | 59 | 1.917344183 | 6.38E-07 |
| mSigDB c2 | BROWNE_HCMV_INFECTION_24HR_D<br>N                     | 126  | 2.751765893 | 14 | 5.087642098 | 6.38E-07 |
| mSigDB c7 | GSE8515_IL1_VS_IL6_4H_STIM)MAC_<br>UP                 | 166  | 3.625342367 | 16 | 4.413376277 | 7.11E-07 |
| mSigDB c2 | SANA TNF SIGNALING UP                                 | 61   | 1.332204123 | 10 | 7.506357193 | 7.16E-07 |
| mSigDB c2 | STEGER ADIPOGENESIS DN                                | 25   | 0.545985296 | 7  | 12.82085809 | 7.58E-07 |
| mSigDB c2 | LI_WILMS_TUMOR_VS_FETAL_KIDNE<br>Y 2 DN               | 48   | 1.048291769 | 9  | 8.58539604  | 7.97E-07 |
| mSigDB c5 | EXTRACELLULAR REGION                                  | 255  | 5.569050022 | 20 | 3.591276775 | 8.24E-07 |
| mSigDB c7 | GSE360_HIGH_DOSE_B_MALAYI_VS_M<br>TUBERCULOSIS_MAC DN | 149  | 3.254072366 | 15 | 4.609608612 | 9.13E-07 |
| mSigDB c2 | WANG SMARCE1 TARGETS UP                               | 234  | 5.110422373 | 19 | 3.717892302 | 9.25E-07 |
| mSigDB c2 | VECCHI_GASTRIC_CANCER_ADVANC<br>ED_VS_EARLY UP        | 150  | 3.275911777 | 15 | 4.578877888 | 9.94E-07 |



**Table S3. Related to Figure 7 and Figure S9.** Percentages of individual fluorescent cells in physiological conditions and 7 and 21 days after HLI quantified as described in Star Methods.

|                   | %RFP  | %YFP  | %CFP | %GFP  |
|-------------------|-------|-------|------|-------|
| Physiological     | 27.20 | 48.52 | 9.47 | 14.80 |
| 7 days after HLI  | 56.24 | 31.78 | 4.22 | 7.73  |
| 21 days after HLI | 41.8  | 40.4  | 5.58 | 12.19 |
